1 **Association of lithocholic acid with skeletal muscle hypertrophy through TGR5-IGF-1**  
2 **and skeletal muscle mass in chronic liver disease rats and humans.**

3 Yasuyuki Tamai<sup>1#</sup>, Akiko Eguchi<sup>1#</sup>, Ryuta Shigefuku<sup>1</sup>, Hiroshi Kitamura<sup>2</sup>, Mina Tempaku<sup>1</sup>,  
4 Ryosuke Sugimoto<sup>1</sup>, Yoshinao Kobayashi<sup>3</sup>, Motoh Iwasa<sup>1</sup>, Yoshiyuki Takei<sup>1</sup> and Hayato  
5 Nakagawa<sup>1</sup>

6  
7 <sup>1</sup>Department of Gastroenterology and Hepatology, Mie University Graduate School of  
8 Medicine, <sup>2</sup>Department of Veterinary Medicine, School of Veterinary Medicine, Rakuno  
9 Gakuen University, <sup>3</sup>Center for Physical and mental health, Mie University Graduate School  
10 of Medicine

11 # Equal contributed first author

12  
13 **Address for correspondence:** Dr. Akiko Eguchi

14 Department of Gastroenterology and Hepatology, Mie University Graduate School of  
15 Medicine

16 2-174 Edobashi, Tsu, Mie, 514-8507, Japan

17 Tel: +81-59-231-9238

18 Email: akieguchi@med.mie-u.ac.jp

19

20 **Running title: LCA effects on skeletal muscle hypertrophy**

21

22 **Funding:** This research was supported by JSPS KAKENHI Grant Number 22K08011 and  
23 21H02892, and AMED under Grant Number JP21fk0210090 and JP22fk0210115.

24

25 **Conflict of Interest:** The authors state no conflict of interest.

26

27 **Key words:** chronic liver diseases, low muscle mass, skeletal muscle, bile acids, lithocholic  
28 acid, liver-muscle axis.

29

30 **Abbreviation:** CLD; chronic liver disease, LCA; lithocholic acid, TGR5; G-protein-coupled  
31 receptor 5, BA; bile acid, BCAA; branched-amino acid, PMI; psoas muscle area index, IGF;  
32 insulin growth factor, mTOR; mammalian target of rapamycin; SMI, skeletal muscle index,  
33 CA; cholic acid, CDCA; chenodeoxycholic acid, DCA; deoxycholic acid, MHC; myosin heavy  
34 chain.

35

36

37 **Abstract**

38 [Background & aims] Hepatic sarcopenia is one of many complications associated with  
39 chronic liver disease (CLD) and has a high mortality rate, however, the liver-muscle axis is  
40 not fully understood. Therefore, few effective treatments exist for hepatic sarcopenia, the best  
41 of which being branched-amino acid (BCAA) supplementation to help increase muscle mass.  
42 Our aim was to investigate the molecular mechanism(s) of hepatic sarcopenia focused on  
43 bile acid (BA) composition. [Methods] Gastrocnemius muscle phenotype and serum BA  
44 levels were assessed in CLD rats treated with BCAA. Mouse skeletal muscle cells (C2C12)  
45 were incubated with lithocholic acid (LCA), G-protein-coupled receptor 5 (TGR5) agonist or  
46 TGR5 antagonist to assess skeletal muscle hypertrophy. The correlation between serum BA  
47 levels and psoas muscle area index (PMI) was examined in 73 CLD patients. [Results]  
48 Gastrocnemius muscle weight significantly increased in CLD rats treated with BCAA via  
49 suppression of protein degradation pathways, coupled with a significant increase in serum  
50 LCA levels. LCA treated C2C12 hypertrophy occurred in a concentration-dependent manner  
51 linked with TGR5-Akt pathways based upon inhibition results via a TGR5 antagonist. In  
52 human CLD, serum LCA levels were the sole factor positively correlated with PMI and were  
53 significantly decreased in both the low muscle mass group and the deceased group. Serum  
54 LCA levels were also shown to predict patient survival. [Conclusion] Our results indicate  
55 LCA-mediated skeletal muscle hypertrophy via activation of TGR5-IGF1-Akt signaling

56 pathways. In addition, serum LCA levels were associated with skeletal muscle mass in  
57 cirrhotic rats, as well as CLD patients, and predicted overall patient survival. [Funding] This  
58 research was supported by JSPS KAKENHI Grant Number 22K08011 and 21H02892, and  
59 AMED under Grant Number JP21fk0210090 and JP22fk0210115.

60

## 61 **Introduction**

62 Hepatic sarcopenia differs from aging sarcopenia insofar as it is defined by a rapid decrease  
63 in muscle mass and power. Hepatic sarcopenia is but one in the panoply of complications  
64 associated with chronic liver diseases (CLD), in particular liver cirrhosis with its high mortality  
65 (or low survival rate) and poor post-liver transplantation outcomes (Ebadi et al., 2019, Hara et  
66 al., 2016). A variety of factors are altered in hepatic sarcopenia, including decreased serum  
67 branched-chain amino acid (BCAA) levels (Tajiri and Shimizu, 2018), increased bile acids  
68 (BAs) (Kobayashi et al., 2017), abnormal insulin growth factor-1 (IGF-1) and mammalian  
69 target of rapamycin (mTOR) signaling pathways (Allen et al., 2021), increased reactive  
70 oxygen species and increased inflammatory cytokines and myostatin expression (Ebadi et al.,  
71 2019, Allen et al., 2021). BCAA supplementation has been shown to significantly improve  
72 skeletal muscle index measurements (Ismail et al., 2022). In contrast, anti-myostatin  
73 monoclonal neutralizing antibodies developed by several companies failed in clinical trials  
74 targeted to treat Duchenne muscular dystrophy (Wagner, 2020). The molecular mechanisms

75 underpinning the muscle-liver axis involved in hepatic sarcopenia are not fully understood.  
76 Therefore, the elucidation of molecular mechanisms and effective treatment designs are  
77 required to prevent the progression of hepatic sarcopenia and to improve overall patient  
78 prognosis.

79 CLD has a major impact on BA composition (Sauerbruch et al., 2021). BAs are amphipathic  
80 steroid molecules synthesized from cholesterol and are categorized as being primary or  
81 secondary. Primary BAs are synthesized and conjugated in hepatocytes and secreted into  
82 the intestine. Most conjugated BAs undergo deconjugation and dehydration by intestinal  
83 bacteria, resulting in the production of secondary BAs. BA pools containing a mix of primary  
84 and secondary BAs are essential for solubilizing lipids and fat-soluble vitamins thus  
85 promoting their absorption into the small intestine. In addition to their canonical function in  
86 digestion, BAs are known to act as signaling molecules that regulate metabolic pathways,  
87 such as glucose, lipid and energy homeostasis, through various receptors including  
88 G-protein-coupled receptor 5 (TGR5), farnesoid X receptor and vitamin D receptor (Arab et  
89 al., 2017). TGR5 activation induced by cholic acid (CA), chenodeoxycholic acid (CDCA),  
90 deoxycholic acid (DCA) and lithocholic acid (LCA) as part of the overall BA composition is a  
91 key event regulating skeletal muscle cells with the most potent endogenous ligand for TGR5  
92 being LCA (Pols et al., 2011). Indeed, LCA, a secondary BA, induced TGR5 activation in  
93 skeletal muscle and enhanced muscle mass hypertrophy in mice through an increase in

94 IGF-1, a known muscle hypertrophy-related gene (Sasaki et al., 2018). However, the role of  
95 LCA in cirrhotic liver disease-related sarcopenia has not been fully clarified.

96 In this study, we investigate the interaction between BAs, including LCA, and skeletal  
97 muscle mass, in CLD rats, as well as CLD patients, and explore the beneficial effect of LCA  
98 on skeletal muscle hypertrophy.

99

## 100 **Results**

### 101 **Increased gastrocnemius muscle weight is associated with suppression of protein** 102 **degradation pathways and elevation of serum LCA levels in CLD rats treated with** 103 **BCAA.**

104 To investigate whether increased gastrocnemius muscle weight is associated with changes in  
105 BA composition, we used a CLD rat model administered with carbontetrachloride (CCl<sub>4</sub>) for  
106 10 weeks (4 weeks to establish advanced fibrosis, or cirrhosis, and an additional 6 weeks to  
107 treat with BCAA for attenuation of liver injury), which we have previously reported (Tamai et  
108 al., 2021). The ratio of gastrocnemius muscle weight to total body weight was significantly  
109 increased in CLD rats treated with BCAA (CLD+BCAA) compared to untreated CLD rats (p  
110 <0.05) (Figure. 1A). The overall pathological condition of gastrocnemius muscle was similar  
111 between CLD and CLD+BCAA rats (Figure. 1B). Moreover, in concordance with the  
112 aforementioned gastrocnemius muscle mass results, gastrocnemius muscle gene expression

113 levels of protein degradation pathways including muscle RING finger 1 (MuRF1), muscle  
114 atrophy F-box protein (MafBx), ubiquitin and E214KDa were notably increased in CLD rats  
115 compared with normal rats (indicated as a broken line in the graphs) and MafBx mRNA levels  
116 were significantly decreased in gastrocnemius muscle from CLD+BCAA rats ( $p < 0.05$ )  
117 (Figure. 1C). The mRNA levels of the repair gene, transcription factor forkhead box O1  
118 (FOXO1), were notably decreased in CLD rat gastrocnemius muscle samples, but expression  
119 recovered in gastrocnemius muscle samples from CLD+BCAA rats (Figure. 1C). To explore  
120 whether increased gastrocnemius muscle mass was associated with BA composition, we  
121 measured serum BA levels in CLD and CLD+BCAA rats. Total BAs were dramatically  
122 increased in CLD rats when compared to normal rats (indicated as a broken line in a graph)  
123 and decreased in CLD+BCAA rats (Figure. 1D). In line with the total BA data, the ratio of CA,  
124 CDCA and DCA increased in CLD rats and showed a decreasing trend in CLD+BCAA rats  
125 (Figure. 1E). Notably, the ratio of LCA to total BAs was dramatically decreased in CLD rats  
126 and was significantly increased in the CLD+BCAA rat group ( $p < 0.05$ ) (Figure. 1E). These  
127 results suggest that an increase in gastrocnemius muscle mass may be associated with  
128 serum LCA levels.

129

130 **LCA enhances muscle cell hypertrophy through TGR5-IGF-1 pathway.**

131 We next examined the effect of LCA on hypertrophy of skeletal muscle cells using C2C12  
132 myoblasts that differentiate rapidly forming myotubes. C2C12 myoblasts were culture for 3  
133 days and approached confluence, then differentiated to myotubes using varying  
134 concentrations of LCA (Figure. 2A). The hypertrophy of C2C12 myotubes was overtly altered  
135 in a concentration-dependent manner based on assessment using myosin heavy chain  
136 (MHC) staining (Figure. 2B). Corresponding to cell morphological changes, the length and  
137 width of the cells were significantly increased in a concentration-dependent manner under  
138 quantitative analyses (length,  $p < 0.001$ : 0 vs. 700 nM and 70 vs. 700 nM,  $p < 0.01$ : 0 and 70  
139 nM) (width,  $p < 0.001$ : 0 vs. 70 or 700 nM and 70 vs. 700 nM) (Figure. 2C). Previous reports  
140 have shown LCA to be one of the most potent endogenous ligands for TGR5 (Pols et al.,  
141 2011) capable of inducing IGF-1, which is a known muscle hypertrophy gene (Sasaki et al.,  
142 2018). In the present study, we found the levels of *Tgr5* mRNA to be significantly increased in  
143 C2C12 myotubes treated with LCA ( $p < 0.05$ : 70 and 700 nM) (Figure. 2D). Moreover, C2C12  
144 myotubes undergoing LCA-induced hypertrophy showed significantly elevated levels of *Igf-1*  
145 mRNA (Figure. 2D).

146

#### 147 **TGR5 agonist accelerates muscle cell hypertrophy through IGF-1 and Akt activation.**

148 To investigate whether LCA-induced TGR5-IGF-1 activation is attenuated by blocking the  
149 TGR5 pathway, C2C12 myotubes were coincubated with LCA and TGR5 antagonist



150 (SBI-115). The mRNA levels of *Tgr5* and *Igf-1* were significantly decreased in C2C12  
151 myotubes treated with LCA+SBI-115 compared to LCA alone ( $p < 0.01$  and  $p < 0.05$ ,  
152 respectively) (Figure. 3A). LCA is the most potent endogenous ligand for TGR5, but also  
153 cytotoxic (Pols et al., 2011), therefore, LCA alone may not be an appropriate therapeutic  
154 target molecule. A TGR5 agonist (INT-777) has been generated and shown to be a useful  
155 molecule for TGR5 activation (Pellicciari et al., 2009). To explore whether this TGR5 agonist  
156 induces muscle cell hypertrophy, differentiated C2C12 myoblasts (myotubes) were incubated  
157 with INT-777. INT-777 induced obvious muscle cell hypertrophy when assessed using MHC  
158 staining (Figure. 3B). INT-777 also elevated the mRNA levels of *Tgr5* and *Igf1* ( $p < 0.01$  and  $p <$   
159  $0.001$ , respectively) (Figure. 3C). IGF-1 is known to activate the PI3K-Akt pathway, thus  
160 leading to stimulation of protein synthesis, resulting in accelerated muscle hypertrophy  
161 (Sartori et al., 2021). Indeed, the ratio of Akt phosphorylation against to total Akt was  
162 significantly increased in C2C12 myotubes treated with INT-777 (Figure. 3D). These results  
163 suggest that the TGR5-IGF-1-Akt3 pathway contributes to muscle hypertrophy.

164

165 **Serum LCA levels are positively and significantly correlated with PMI in CLD patients.**

166 The clinical features of the 73 (58 men and 15 women) enrolled CLD patients are shown in  
167 Table 1. The cohort of patients admitted to our study was based on a variety of causative  
168 agents: 13 hepatitis B virus (HBV), 21 hepatitis C virus (HCV), 21 nonalcoholic steatohepatitis

169 (NASH), 16 alcoholism and 2 other factors. Patients infected with HBV or HCV were under  
170 infection control, with sustained virological response monitoring, by direct-acting antiviral  
171 treatment against HCV, or treatment with nucleos(t)ide analogs against HBV in the clinical  
172 course of each patient. The Barcelona Clinic Liver Cancer (BCLC) staging showed 11, 29, 13,  
173 19 and 1 patients in Stage 0, A, B, C, and D, respectively.

174 The patient mean of total serum BAs was  $18.3 \pm 17.0$   $\mu\text{mol/L}$ , composed of primary BAs ( $12.7$   
175  $\pm 14.0$   $\mu\text{mol/L}$ ) and secondary BAs ( $5.58 \pm 7.91$   $\mu\text{mol/L}$ ). The serum level of 15 individual BA  
176 compositions are shown in Table 2. Total serum primary BA level was negatively correlated  
177 with albumin ( $r = -0.456$ ,  $p < 0.0001$ ) and prothrombin time (PT, %) ( $r = -0.410$ ,  $p < 0.001$ ) and  
178 was positively correlated with alkaline phosphatase (ALP) ( $r = 0.240$ ,  $p < 0.05$ ) (Figure. 4A).

179 Furthermore, the total primary BA level was significantly higher in albumin-bilirubin (ALBI)  
180 grade 2 and 3 than in ALBI grade 1 ( $p < 0.001$ ) (Figure. 4B). Notably, psoas muscle area  
181 index (PMI) values were positively and significantly correlated with serum LCA levels ( $r$   
182  $= 0.304$ ,  $p < 0.01$ ) and serum LCA ratio, which was LCA/total BAs ( $r = 0.230$ ,  $p < 0.05$ ), and the  
183 only BA composition correlated with PMI (Figure. 4C). Next, we set out to assess the  
184 changes in serum BA composition associated with muscle mass. To do this the cohort was  
185 divided into two groups: low muscle mass, defined by PMI below  $6.36 \text{ cm}^2/\text{m}^2$  for men and  
186  $3.92 \text{ cm}^2/\text{m}^2$  for women (Hamaguchi et al., 2016), and normal muscle mass. The level of total  
187 primary BAs was decreased and total secondary BAs was increased in the low muscle mass

188 group compared with the normal muscle mass group (Figure. 4D). The level of serum TGR5  
189 ligands, CA, CDCA, DCA and LCA were also decreased in the low muscle mass group  
190 (Figure. 4D). In particular, the level of serum LCA was significantly decreased in the low  
191 muscle mass group (Figure. 4D). These results show that serum LCA levels are indicative of  
192 overall muscle mass in CLD patients.

193

194 **Serum LCA levels may be a prognostic factor for survival.**

195 Finally, we investigated the association between serum BA composition levels and survival.

196 23 out of 73 patients (31.5 %) died in the average follow-up period of  $1005 \pm 471$  days

197 following our study period. Serum total primary BA levels were significantly elevated in the

198 deceased group ( $p < 0.05$ ), while serum LCA levels were significantly decreased in the

199 deceased group compared to the survival group ( $p < 0.05$ ) (Figure. 5A). ROC analyses

200 concerning predictors of survival yielded AUC values of 0.670 (95% confidence interval:

201 0.542-0.797) ( $p < 0.05$ ) for total primary BAs and 0.649 (95% confidence interval:

202 0.519-0.779) ( $p < 0.05$ ) for LCA (Figure. 5B). In the present study, we calculated the ROC

203 analysis survival curve cut-off values for total primary BAs at  $10.5 \mu\text{mol/L}$  (sensitivity 69.6%

204 and specificity 68.0%) and LCA at  $0.32 \mu\text{mol/L}$  (sensitivity 73.9% and specificity 60%).

205 Patients with low total primary BAs ( $< 10.5$ ) showed significantly better OS than patients with

206 high total primary BAs ( $p < 0.01$ ) (Figure. 5C). Furthermore, patients with high LCA ( $\geq 0.32$ )

207 showed significantly improved OS than patients with low LCA ( $p < 0.01$ ) (Figure. 5C). These  
208 results suggest that serum LCA levels can be useful in predicting patient survival.

209

## 210 **Discussion**

211 In the present study, we demonstrated that serum LCA levels and LCA ratio were positively  
212 associated with skeletal muscle mass in CLD rats treated with BCAA, as well as human  
213 subjects, and that LCA-induced skeletal muscle cell hypertrophy occurs through  
214 TGR5-IGF-1-Akt3 activation. BCAA supplementation is approved for use in CLD patients  
215 within the clinical setting as a means to provide compensatory albumin thus maintaining liver  
216 function (European Association for the Study of the Liver. Electronic address and European  
217 Association for the Study of the, 2019), as well as increased muscle mass associated with an  
218 acceleration of the TCA cycle (Ismail et al., 2022). In our previous study, we reported that  
219 hepatocellular damage was attenuated using BCAA supplementation as a result of improved  
220 lipid metabolism and mitochondrial damage repair in CLD rats (Tamai et al., 2021). Using the  
221 same CLD rat model in the current study, we revealed that gastrocnemius muscle mass was  
222 significantly increased using BCAA treatment. BCAA treatment has direct effects on liver and  
223 skeletal muscle, however we hypothesized that one or more CLD-related molecules/factors  
224 might regulate skeletal muscle mass via a liver-muscle axis. Indeed, we found that the serum  
225 LCA ratio (LCA/total BAs) was significantly increased in CLD rats, which also showed an

226 increase in gastrocnemius muscle mass. Furthermore, we showed that serum LCA and LCA  
227 ratio were significantly and positively associated with PMI in CLD patients. These results from  
228 CLD rats and human subjects suggest that LCA can regulate muscle mass via a liver-muscle  
229 axis, although further studies are warranted in the future using a greater number of patients  
230 as part of a multicenter study.

231 The role of LCA in the progression of CLD has not been fully developed due to the lack of  
232 general sensitivity in the system used to measure BA composition and is therefore not  
233 sufficient to detect low levels of LCA in the blood. Our established highly-sensitive system for  
234 BA composition (Murakami et al., 2018) allows us to detect all aspects of BA composition  
235 resulting in the discovery of a new role for LCA, which is a positive correlation of serum BA  
236 composition with skeletal muscle mass in CLD patients. Furthermore, we revealed that a  
237 decrease in serum LCA level portends a worse survival outcome in CLD patients with  
238 associated low muscle mass. CLD patients with sarcopenia, defined by low muscle mass and  
239 power, also display decreased survival when compared to CLD patients without sarcopenia  
240 (Hara et al., 2016), thus serum LCA may be a useful measure to monitor sarcopenia in CLD  
241 patients. Current reports have also demonstrated that LCA is one of the most potent  
242 anti-bacterial agents, selective against gram-positive bacteria, resulting in a longer lifespan of  
243 centenarians (Sato et al., 2021) and is one of the most potent endogenous ligands for TGR5,  
244 which protects against alcohol-induced liver steatosis and inflammation in mice

245 (Iracheta-Vellve et al., 2018). This evidence clearly shows that LCA plays a critical role in the  
246 progression of CLD, and intestinal microbiota, as a function of the liver-gut axis. Our latest  
247 results presented here, associating LCA with skeletal muscle mass, will lead to new insights  
248 into the role of LCA as a component of the liver-muscle-gut axis.

249 In CLD rats and human subjects, we observed an association between gastrocnemius  
250 muscle mass and LCA only, although serum CA, CDCA and DCA levels also showed a  
251 decreasing trend in CLD patients with low muscle mass. This result is reasonable since the  
252 hierarchy of BA affinity for TGR5 is as follows: LCA > DCA > CDCA > CA (Sato et al., 2007).  
253 We also demonstrated that a TGR5 antagonist induced skeletal muscle cell hypertrophy  
254 through IGF-1 activation, but we need further studies to develop a new antagonist with similar  
255 affinity of LCA to the TGR5 binding pocket minus the cytotoxicity aspect.

256 In conclusion, we revealed new roles for LCA as a positive regulator of skeletal muscle  
257 mass in both CLD rats and human patients, and as a mediator of skeletal muscle cell  
258 hypertrophy in differentiated C2C12 myoblasts (myotubes). The serum LCA ratio  
259 measurement was significantly decreased in CLD patients with low muscle mass. Current  
260 results suggest that serum LCA levels may be used as a prognostic factor of survival in CLD  
261 patients with sarcopenia, and a TGR5 agonist holds the potential to be a candidate as a  
262 therapeutic target in the prevention of sarcopenia in CLD patients.

263

264 **Methods**

265 **Animal samples**

266 Our animal protocol (HKD43046) was reviewed and approved by the Institutional Animal  
267 Care and Use Committee at Hokudo Co., Ltd (Sapporo, Japan). The rat model of CLD has  
268 been previously described in detail (Tamai et al., 2021). Briefly, Wister male rats (SPF, CLEA  
269 Japan: Tokyo, Japan) aged 7 weeks were fed solid normal diet, CE-2 (CLEA Japan), under  
270 conventional conditions and were orally administered CCl<sub>4</sub> at 1.0 mL/kg twice a week for 4  
271 weeks to induce advanced fibrosis, or cirrhosis, at which point the animals were divided into 2  
272 groups by weight stratified random sampling. The CLD rats then received daily oral  
273 administration of BCAA (10 g/kg/day) (n =10), or 0.9% saline solution (control) (n =10) for 6  
274 weeks. The CLD state was maintained with twice weekly administration of CCl<sub>4</sub> at 0.5 mL/kg  
275 for 6 weeks (10 weeks total). The rats were individually maintained at a constant temperature  
276 (23 ± 3 °C), 50 ± 20% relative humidity and 12 h light–dark cycles (lights on at 7 am), and had  
277 free access to food and water. Analysis of rat number was 9/10 in BCAA group and 8/10 in  
278 control group due to death by CCl<sub>4</sub> in the experimental term. Wister male rats aged 10 weeks  
279 were used as a control, wild-type rats (n=3).

280

281 **Gastrocnemius muscle histological analysis and serum BA measurement in rats**

282 All rats were sacrificed at the conclusion of our treatment protocol under anesthesia  
283 (isoflurane, DS-pharma, Osaka, Japan). Whole rat blood was collected and allocated into  
284 tubes with anticoagulant (EDTA). A portion of gastrocnemius muscle was fixed in 10%  
285 formalin for 24 h and embedded in paraffin and the remaining gastrocnemius muscle was  
286 flash frozen in liquid nitrogen and stored at -80°C. The gastrocnemius muscle sections were  
287 prepared and stained for H&E (hematoxylin and eosin). All images were taken by Olympus  
288 CKX53 (Olympus, Tokyo, Japan) and quantitated using Image J software (NIH Image).  
289 Serum BA levels were quantified by LC-MS/MS at CMIC Pharma Science Co., Ltd. (Kobe,  
290 Japan).

291

## 292 **Patients and serum BA measurements in human**

293 The study protocol (H2019-063) was approved by the Clinical Research Ethics Review  
294 Committee of Mie University Hospital. This study was performed retrospectively on stored  
295 samples, and subjects were allowed to opt out of their data being used. Written informed  
296 consent was obtained from all subjects at the time of blood sampling. A total of 113  
297 treatment-naïve patients with hepatocellular carcinoma (HCC) hospitalized in the Department  
298 of Gastroenterology and Hepatology, Mie University Hospital for treatment of HCC between  
299 January 2015 and January 2017 were included as a retrospective study. HCC diagnosis was  
300 based on clinical history, serologic testing and radiologic imaging. 36 patients were excluded



301 due to oral administration of ursodeoxycholic acid. Three patients who had other  
302 malignancies within the past 3 years were excluded. One patient was excluded due to kidney  
303 transplant. As a result, a total of 73 patients with CLD were analyzed for the current study.  
304 Patients positive for hepatitis B surface antigen were diagnosed with HBV infection, whereas  
305 those positive for anti-HCV were diagnosed with HCV infection. Alcohol associated liver  
306 disease was defined as alcohol consumption >60g/day. NASH was diagnosed based on  
307 pathological findings and/or fatty liver without any other evident causes of chronic liver  
308 diseases (viral, autoimmune, genetic, etc.). Hepatic functional reserve was categorized by  
309 ALBI score (Johnson et al., 2015). The PMI [psoas muscle area at the middle of the third  
310 lumbar vertebra (L3) (cm<sup>2</sup>)/height (m)<sup>2</sup>] was manually calculated from CT images. All  
311 treatments were performed following the Japanese practical guidelines for HCC as possible  
312 (Kokudo et al., 2019). Post-HCC treatment follow-up consisted of laboratory tests, including  
313 tumor markers, every 3 months and dynamic CT or magnetic resonance imaging every 6  
314 months.  
315 BA concentrations were determined in a blind as described by Ando et al. with minor  
316 modifications (Murakami et al., 2018, Ando et al., 2006). After the addition of internal  
317 standards and 0.5 M potassium phosphate buffer (pH 7.4), BAs were extracted with Bond  
318 Elut C18 cartridges and quantified by LC-MS/MS. Chromatographic separation was  
319 performed using a Hypersil GOLD column (150 × 2.1 mm, 3.0 μm; Thermo Fisher Scientific)

320 at 40°C. The mobile phase consisted of (A) 20 mM ammonium acetate buffer (pH  
321 7.5)-acetonitrile-methanol (70:15:15, v/v/v) and (B) 20 mM ammonium acetate buffer (pH  
322 7.5)-acetonitrile-methanol (30:35:35, v/v/v). The following gradient program was used at a  
323 flow rate of 200 µl/min: 0–100% B for 20 min, hold 100% B for 10 min, and re-equilibrate to  
324 100% A for 8 min.

325

### 326 **Cell culture, treatment and immunofluorescence**

327 C2C12 myoblasts (kindly gift from Dr. Fujita at Tokyo institute of Technology) were  
328 maintained in DMEM containing 20% FBS at 37 °C and 5% CO<sub>2</sub>. The confluent cells were  
329 differentiated into myotubes by culturing with DMEM containing 2% horse serum for 5 days  
330 with LCA (Millipore-Sigma, Japan), TGR5 agonist (1 µM INT-777, Millipore-Sigma) or TGR5  
331 agonist plus TGR5 antagonist (100 µM SBI-115, Millipore-Sigma). All experiments were  
332 repeated twice with three biological replicates in each experiment. For immunofluorescence,  
333 cells were fixed with 4% paraformaldehyde for 10 min, permeabilized with 0.5% Triton X-100  
334 for 5min and then incubated with anti-MHC antibody (#376157, Santa Cruz, Dallas, TX) at 4  
335 °C overnight. MHC and nucleus were visualized with Alexa 488-conjugated anti-mouse  
336 antibody and DAPI, respectively. All pictures were taken by KEENC BZ-X710 (KEYENCE,  
337 Japan). Changes in cell strength and width were quantified using NIH ImageJ software.

338

339 **Gene expression**

340 Total RNA was isolated from gastrocnemius muscle or C2C12 cells using TRI Reagent  
341 (Molecular Research Center, Cincinnati, OH) according to the manufacturer's instructions.  
342 The cDNA was synthesized from total RNA using a cDNA Synthesis kit (Takara, Shiga,  
343 Japan). Real-time PCR quantification was performed using the KAPA SYBR FAST qPCR  
344 master mix (KAPA Biosystems, Wilmington, MA) or a TaqMan gene expression assay  
345 (Thermo Fisher Scientific Inc.) for *Sod1*, and the 7300 Real-Time PCR Detection System  
346 (Thermo Fisher Scientific Inc.). The PCR primers were used to amplify each gene as listed in  
347 Supplemental Table 1. Mean values of mRNA were normalized to *beta 2 microglobulin*  
348 (*B2m*).

349

350 **Western Blotting Analysis**

351 C2C12 cells were homogenized in RIPA buffer (150 mM NaCl, 1.0% NP-40, 1% sodium  
352 deoxycholate, 0.1% sodium dodecyl sulphate, 50 mM Tris-HCl pH8.0) containing a protease  
353 inhibitor cocktail (Millipore-Sigma) and phosphatase inhibitors (Millipore-Sigma). 20 µg of cell  
354 lysate was resolved using a TGX gel (Bio-Rad, Hercules, CA), transferred to  
355 a polyvinylidenedifluoride membrane, and blotted with the appropriate primary antibody.  
356 Membranes were incubated with peroxidase-conjugated secondary antibody (GE Healthcare  
357 Bioscience, Marlborough, MA). Protein bands were visualized using an

358 enhanced chemiluminescence reagent (Bio-Rad), digitized using a Lumino-image analyzer  
359 (LAS-4000 iniEPUV, Fuji Film, Tokyo, Japan), and quantitated using the program Multi  
360 Gauge (Fuji Film). Anti-GAPDH (#60004, Proteintech, Rosemont, IL), anti-phospho-Akt (Ser  
361 473) (#4060, Cell Signaling Technology, Danvers, MA) and anti-pan-Akt (#4691, Cell  
362 Signaling Technology) were used as primary antibodies.

363

#### 364 **Statistical analyses**

365 Continuous variables are presented as mean  $\pm$  standard deviation or median  
366 (minimum-maximum), and categorical variables are shown as numbers of patients. The  
367 continuous data were compared using the Mann-Whitney U or unpaired t test in two groups or  
368 Kruskal-Wallis in multiple groups. The relationship between the serum BA levels and clinical  
369 data were examined using Spearman's rank correlation coefficient. The categorical data were  
370 compared using the Chi-squared test. Receiver operator characteristic (ROC) curves and the  
371 corresponding area under the curve (AUC) were used to obtain cut-offs for the outcomes.  
372 The Youden index was applied to calculate the optimal cut-off point. Overall survival (OS)  
373 was measured using the Kaplan-Meier method and compared using the log-rank test. All  
374 statistical analyses were performed using SPSS23.0 software (IBM, Armonk, NY) or Prism 9  
375 (GraphPad Software, Inc., CA, USA). Differences were considered to be significant at p  
376 <0.05.

377

#### 378 **Acknowledgement**

379 We would like to thank Dr. Teruo Miyazaki, Dr. Akira Honda and Dr. Tadashi Ikegami in

380 Department of Gastroenterology, Tokyo Medical University Ibaraki medical center for

381 measurement of human BAs.

382

### 383 **References**

384 ALLEN, S. L., QUINLAN, J. I., DHALIWAL, A., ARMSTRONG, M. J., ELSHARKAWY, A. M.,  
385 GREIG, C. A., LORD, J. M., LAVERY, G. G. & BREEN, L. 2021. Sarcopenia in chronic  
386 liver disease: mechanisms and countermeasures. *Am J Physiol Gastrointest Liver*  
387 *Physiol*, 320, G241-G257.

388 ANDO, M., KANEKO, T., WATANABE, R., KIKUCHI, S., GOTO, T., IIDA, T., HISHINUMA, T.,  
389 MANO, N. & GOTO, J. 2006. High sensitive analysis of rat serum bile acids by liquid  
390 chromatography/electrospray ionization tandem mass spectrometry. *J Pharm Biomed*  
391 *Anal*, 40, 1179-86.

392 ARAB, J. P., KARPEN, S. J., DAWSON, P. A., ARRESE, M. & TRAUNER, M. 2017. Bile acids  
393 and nonalcoholic fatty liver disease: Molecular insights and therapeutic perspectives.  
394 *Hepatology*, 65, 350-362.

395 EBADI, M., BHANJI, R. A., MAZURAK, V. C. & MONTANO-LOZA, A. J. 2019. Sarcopenia in  
396 cirrhosis: from pathogenesis to interventions. *J Gastroenterol*, 54, 845-859.

397 EUROPEAN ASSOCIATION FOR THE STUDY OF THE LIVER. ELECTRONIC ADDRESS,  
398 E. E. E. & EUROPEAN ASSOCIATION FOR THE STUDY OF THE, L. 2019. EASL  
399 Clinical Practice Guidelines on nutrition in chronic liver disease. *J Hepatol*, 70,  
400 172-193.

401 HAMAGUCHI, Y., KAIDO, T., OKUMURA, S., KOBAYASHI, A., HAMMAD, A., TAMAI, Y.,  
402 INAGAKI, N. & UEMOTO, S. 2016. Proposal for new diagnostic criteria for low  
403 skeletal muscle mass based on computed tomography imaging in Asian adults.  
404 *Nutrition*, 32, 1200-5.

405 HARA, N., IWASA, M., SUGIMOTO, R., MIFUJI-MOROKA, R., YOSHIKAWA, K.,  
406 TERASAKA, E., HATTORI, A., ISHIDOME, M., KOBAYASHI, Y., HASEGAWA, H.,  
407 IWATA, K. & TAKEI, Y. 2016. Sarcopenia and Sarcopenic Obesity Are Prognostic  
408 Factors for Overall Survival in Patients with Cirrhosis. *Intern Med*, 55, 863-70.

409 IRACHETA-VELLVE, A., CALENDIA, C. D., PETRASEK, J., AMBADE, A., KODYS, K.,  
410 ADORINI, L. & SZABO, G. 2018. FXR and TGR5 Agonists Ameliorate Liver Injury,  
411 Steatosis, and Inflammation After Binge or Prolonged Alcohol Feeding in Mice.

412 *Hepatol Commun*, 2, 1379-1391.

413 ISMAIEL, A., BUCSA, C., FARCAS, A., LEUCUTA, D. C., POPA, S. L. & DUMITRASCU, D. L.  
414 2022. Effects of Branched-Chain Amino Acids on Parameters Evaluating Sarcopenia  
415 in Liver Cirrhosis: Systematic Review and Meta-Analysis. *Front Nutr*, 9, 749969.

416 JOHNSON, P. J., BERHANE, S., KAGEBAYASHI, C., SATOMURA, S., TENG, M., REEVES,  
417 H. L., O'BEIRNE, J., FOX, R., SKOWRONSKA, A., PALMER, D., YEO, W., MO, F.,  
418 LAI, P., INARRAIRAEGUI, M., CHAN, S. L., SANGRO, B., MIKSAD, R., TADA, T.,  
419 KUMADA, T. & TOYODA, H. 2015. Assessment of liver function in patients with  
420 hepatocellular carcinoma: a new evidence-based approach-the ALBI grade. *J Clin*  
421 *Oncol*, 33, 550-8.

422 KOBAYASHI, Y., HARA, N., SUGIMOTO, R., MIFUJI-MOROKA, R., TANAKA, H., EGUCHI,  
423 A., IWASA, M., HASEGAWA, H., IWATA, K., TAKEI, Y. & TAGUCHI, O. 2017. The  
424 Associations between Circulating Bile Acids and the Muscle Volume in Patients with  
425 Non-alcoholic Fatty Liver Disease (NAFLD). *Intern Med*, 56, 755-762.

426 KOKUDO, N., TAKEMURA, N., HASEGAWA, K., TAKAYAMA, T., KUBO, S., SHIMADA, M.,  
427 NAGANO, H., HATANO, E., IZUMI, N., KANEKO, S., KUDO, M., IIJIMA, H., GENDA,  
428 T., TATEISHI, R., TORIMURA, T., IGAKI, H., KOBAYASHI, S., SAKURAI, H.,  
429 MURAKAMI, T., WATADANI, T. & MATSUYAMA, Y. 2019. Clinical practice guidelines  
430 for hepatocellular carcinoma: The Japan Society of Hepatology 2017 (4th JSH-HCC  
431 guidelines) 2019 update. *Hepatol Res*, 49, 1109-1113.

432 MURAKAMI, M., IWAMOTO, J., HONDA, A., TSUJI, T., TAMAMUSHI, M., UEDA, H.,  
433 MONMA, T., KONISHI, N., YARA, S., HIRAYAMA, T., MIYAZAKI, T., SAITO, Y.,  
434 IKEGAMI, T. & MATSUZAKI, Y. 2018. Detection of Gut Dysbiosis due to Reduced  
435 Clostridium Subcluster XIVa Using the Fecal or Serum Bile Acid Profile. *Inflamm*  
436 *Bowel Dis*, 24, 1035-1044.

437 PELLICCIARI, R., GIOIELLO, A., MACCHIARULO, A., THOMAS, C., ROSATELLI, E.,  
438 NATALINI, B., SARDELLA, R., PRUZANSKI, M., RODA, A., PASTORINI, E.,  
439 SCHOONJANS, K. & AUWERX, J. 2009. Discovery of  
440 6alpha-ethyl-23(S)-methylcholic acid (S-EMCA, INT-777) as a potent and selective  
441 agonist for the TGR5 receptor, a novel target for diabetes. *J Med Chem*, 52, 7958-61.

442 POLS, T. W., NORIEGA, L. G., NOMURA, M., AUWERX, J. & SCHOONJANS, K. 2011. The  
443 bile acid membrane receptor TGR5: a valuable metabolic target. *Dig Dis*, 29, 37-44.

444 SARTORI, R., ROMANELLO, V. & SANDRI, M. 2021. Mechanisms of muscle atrophy and  
445 hypertrophy: implications in health and disease. *Nat Commun*, 12, 330.

446 SASAKI, T., KUBOYAMA, A., MITA, M., MURATA, S., SHIMIZU, M., INOUE, J., MORI, K. &  
447 SATO, R. 2018. The exercise-inducible bile acid receptor Tgr5 improves skeletal  
448 muscle function in mice. *J Biol Chem*, 293, 10322-10332.

449 SATO, H., GENET, C., STREHLE, A., THOMAS, C., LOBSTEIN, A., WAGNER, A.,

450 MIOSKOWSKI, C., AUWERX, J. & SALADIN, R. 2007. Anti-hyperglycemic activity of  
451 a TGR5 agonist isolated from *Olea europaea*. *Biochem Biophys Res Commun*, 362,  
452 793-8.

453 SATO, Y., ATARASHI, K., PLICHTA, D. R., ARAI, Y., SASAJIMA, S., KEARNEY, S. M., SUDA,  
454 W., TAKESHITA, K., SASAKI, T., OKAMOTO, S., SKELLY, A. N., OKAMURA, Y.,  
455 VLAMAKIS, H., LI, Y., TANOUE, T., TAKEI, H., NITTONO, H., NARUSHIMA, S., IRIE,  
456 J., ITOH, H., MORIYA, K., SUGIURA, Y., SUEMATSU, M., MORITOKI, N., SHIBATA,  
457 S., LITTMAN, D. R., FISCHBACH, M. A., UWAMINO, Y., INOUE, T., HONDA, A.,  
458 HATTORI, M., MURAI, T., XAVIER, R. J., HIROSE, N. & HONDA, K. 2021. Novel bile  
459 acid biosynthetic pathways are enriched in the microbiome of centenarians. *Nature*,  
460 599, 458-464.

461 SAUERBRUCH, T., HENNENBERG, M., TREBICKA, J. & BEUERS, U. 2021. Bile Acids,  
462 Liver Cirrhosis, and Extrahepatic Vascular Dysfunction. *Front Physiol*, 12, 718783.

463 TAJIRI, K. & SHIMIZU, Y. 2018. Branched-chain amino acids in liver diseases. *Transl*  
464 *Gastroenterol Hepatol*, 3, 47.

465 TAMAI, Y., CHEN, Z., WU, Y., OKABE, J., KOBAYASHI, Y., CHIBA, H., HUI, S. P., EGUCHI,  
466 A., IWASA, M., ITO, M. & TAKEI, Y. 2021. Branched-chain amino acids and l-carnitine  
467 attenuate lipotoxic hepatocellular damage in rat cirrhotic liver. *Biomed Pharmacother*,  
468 135, 111181.

469 WAGNER, K. R. 2020. The elusive promise of myostatin inhibition for muscular dystrophy.  
470 *Curr Opin Neurol*, 33, 621-628.

471

## 472 **Figure legends**

473 **Figure 1. Gastrocnemius muscle mass and serum LCA ratio are significantly increased**

474 **in CLD rats treated with BCAA.** (A) Changes in gastrocnemius muscle/body weight in CLD

475 rats (n=9) and CLD rats treated with BCAA (CLD+BCAA)(n=8). (B) Hematoxylin & Eosin

476 (H&E) staining in gastrocnemius muscle sections from CLD and CLD+BCAA rats. Scale bar,

477 50  $\mu$ m. (C) Gene expression of *MuRF1*, *MafBx*, *ubiquitin*, *E214KDa* and *FOXO1* in

478 gastrocnemius muscle from CLD and CLD+BCAA rats as measured by qPCR. All gene

479 expression levels were normalized to housekeeping control,  *$\beta$ 2 microglobulin*, and shown

480 relative to the expression levels of control (normal rats). Broken line indicates the expression  
481 levels of gastrocnemius muscle from normal rats. (D, E) Changes in (C) serum total BAs, (D)  
482 CA/total BAs, CDCA/total BAs, DCA/total BAs and LCA/total BAs in CLD and CLD+BCAA  
483 rats. Broken line indicates the serum BA levels from normal rats.\*p<0.05. Values are mean ±  
484 SEM. CLD; chronic liver disease, MuRF1; muscle RING finger 1, MafBx; muscle atrophy  
485 F-box protein, FOXO1; forkhead box O1, BAs; bile acids, CA; cholic acid, CDCA;  
486 chenodeoxycholic acid, DCA; deoxycholic acid, LCA; lithocholic acid.

487

488 **Figure 2. LCA induces hypertrophy of skeletal muscle cells.** (A) Scheme of experimental  
489 design in C2C12 myoblast to myotubes treated with LCA. (B) Myosin heavy chain (MHC)  
490 staining in C2C12 myotubes treated with 0, 70 and 700 nM of LCA. Scale bar, 50 µm. (C)  
491 Changes in length and width of MHC positive cells quantified from Figure 2B. (D) Gene  
492 expression of *Tgr5* and *Igf-1* in C2C12 myotubes treated with 0, 70 and 700 nM of LCA.  
493 \*\*\*\*p<0.0001, \*\*p<0.01, \*p<0.05. Values are mean ± SEM from three biological replicates.  
494 LCA; lithocholic acid, TGR5; G-protein-coupled receptor 5, IGF; insulin growth factor.

495

496 **Figure 3. Hypertrophy of skeletal muscle cells is induced by TGR5-IGF-1-Akt3**  
497 **activation.** (A) Gene expression of *Tgr5* and *Igf-1* in C2C12 myotubes treated with 70 nM  
498 LCA and 70 nM LCA plus 100 µM of TGR5 antagonist, SBI-115. (B) Myosin heavy chain



499 (MHC) staining in C2C12 myotubes treated with 1  $\mu$ M of TGR5 agonist, INT-777. Scale bar,  
500 50  $\mu$ m. (C) Gene expression of *Tgr5* and *Igf-1* in C2C12 myotubes treated with 1  $\mu$ M of  
501 INT-777. (D) Protein expression of phosphorylated Akt3 (p-Akt3), Akt3 and GAPDH  
502 measured by western blotting in C2C12 myotubes treated with 1  $\mu$ M of INT-777.  
503 Quantification of pAkt3/Akt3 from western blotting membrane. \*\*\* $p < 0.001$ , \*\* $p < 0.01$ , \* $p < 0.05$ .  
504 Values are mean  $\pm$  SEM from three biological replicates. LCA; lithocholic acid, TGR5;  
505 G-protein-coupled receptor 5, IGF; insulin growth factor; Akt3; AKT serine/threonine kinase 3,  
506 GAPDH; glyceraldehyde-3-phosphate dehydrogenase.

507

508 **Figure 4. Serum LCA level is significantly and positively correlated with PMI in CLD**  
509 **patients and is significantly decreased in CLD patients with low muscle mass. (A)**

510 Correlation between total primary BAs and Albumin (ALB), alkaline phosphatase (ALP) or  
511 prothrombin time (PT) (%) in CLD patients. (B) Changes in total primary BAs in CLD patients  
512 with ALBI grade 1 or grade 2-3. (C) Correlation of Psoas muscle mass index (PMI) with  
513 serum LCA and LCA ratio in CLD patients. (D) Changes in total serum primary BAs, total  
514 secondary BAs, CA, CDCA, DCA and LCA in CLD patients with normal muscle mass and low  
515 muscle mass. \*\*\* $p < 0.001$ , \* $p < 0.05$ . Values are mean  $\pm$  SEM. CLD; chronic liver disease,  
516 BAs; bile acids, ALBI; albumin-bilirubin, CA; cholic acid, CDCA; chenodeoxycholic acid, DCA;  
517 deoxycholic acid, LCA; lithocholic acid.

518

519 **Figure 5. Improved survival in CLD patients with high levels of serum LCA.** (A) Serum  
520 total of primary BAs and LCA ratio in survival and deceased CLD patients. (B) ROC curve of  
521 serum total or primary BAs and LCA. (C) CLD patient survival curve with total primary BAs  
522 and LCA. Correlation of Psoas muscle mass index (PMI) with serum LCA and LCA ratio in  
523 CLD patients. \* $p < 0.05$ . Values are mean  $\pm$  SEM. BAs; bile acids, LCA; lithocholic acid, AUC;  
524 area under the curve.

525

526 **Figure 1-source data.** Ratio of gastrocnemius weight/body weight in CLD rats and CLD rats  
527 treated with BCAA (CLD+BCAA). Serum total BAs, CA/total BAs, CDCA/total BAs, DCA/total  
528 BAs and LCA/total BAs in CLD and CLD+BCAA rats.

529 **Figure 2-source data.** Ratio of length and width of MHC positive cells quantified from myosin  
530 heavy chain (MHC) staining in C2C12 myotubes treated with 0, 70 and 700 nM of LCA.

531 **Figure 3-source data.** Original membrane of immunoblotting.

532 **Figure 4-source data.** Serum total primary BAs, albumin (ALB), alkaline phosphatase (ALP),  
533 prothrombin time (PT) (%), psoas muscle mass index (PMI), LCA and LCA ratio in CLD  
534 patients. Serum total serum primary BAs, total secondary BAs, CA, CDCA, DCA and LCA in  
535 CLD patients with normal muscle mass and low muscle mass.

536 **Figure 5-source data.** Serum total of primary BAs and LCA ratio in survival and deceased

537 CLD patients. CLD patient survival curve with total primary BAs and LCA.

538 **Table 1-source data.** Serum albumin, total bilirubin, ALBI, prothrombin time and PMI in CLD

539 patients.

540 **Table 2-source data.** Serum total BAs, total primary BAs, total secondary BAs and bile acids

541 composition in CLD patients.

542

543

544 **Table 1. CLD patient baseline clinical and biochemical profiles of CLD patients.**

|                                       | n=73          |
|---------------------------------------|---------------|
| Age, years                            | 71.0±11.0     |
| Gender, male/female                   | 58/15         |
| Etiology, HBV/HCV/NASH/alcohol/others | 13/21/21/16/2 |
| BCLC (0/A/B/C/D)                      | 11/29/13/19/1 |
| Albumin, g/dl                         | 4.04±0.49     |
| Total bilirubin, mg/dl                | 1.00±0.53     |
| ALBI                                  | -2.65±0.48    |
| Prothrombin time, %                   | 87.6±18.7     |
| PMI, cm <sup>2</sup> /m <sup>2</sup>  | 5.13±1.99     |

545 Data are presented as number of patients, mean ± standard deviation.

546 CLD; chronic liver disease, HBV; hepatitis B virus, HCV; hepatitis C virus, NASH;

547 nonalcoholic steato hepatitis, ALBI: The albumin-bilirubin, PMI: psoas mass index.

548

549 **Table 2. Baseline bile acids composition.**

|                               | n=73 (mmol/L) |
|-------------------------------|---------------|
| Total bile acids              | 18.3±17.0     |
| Total of primary bile acids   | 12.7±14.0     |
| CA                            | 1.30±3.28     |
| GCA                           | 1.71±2.86     |
| TCA                           | 0.35±0.78     |
| CDCA                          | 2.68±4.78     |
| GCDCA                         | 4.69±5.64     |
| TCDCA                         | 1.95±4.03     |
| Total of secondary bile acids | 5.58±7.91     |
| DCA                           | 0.89±1.19     |
| GDCA                          | 0.99±1.88     |
| TDCA                          | 0.19±0.46     |
| LCA                           | 0.067±0.112   |
| GLCA                          | 0.020±0.048   |
| TLCA                          | 0.003±0.013   |
| UDCA                          | 1.13±2.38     |
| GUDCA                         | 2.21±5.56     |
| TUDCA                         | 0.07±0.24     |

550 Data are presented as number of patients, mean ± standard deviation.

551 CA: cholic acid, GCA: glycocholic acid, TCA: taurocholic acid, CDCA: chenodeoxycholic acid,

552 GCDCA: glycochenodeoxycholic acid, TCDCA: taurochenodeoxycholic acid, DCA:

553 deoxycholic acid, GDCA: glycodeoxycholic acid, TDCA: taurodeoxycholic acid, LCA:

554 lithocholic acid, GLCA: glycolithocholic acid, TLCA: tauroolithocholic acid, UDCA:

555 ursodeoxycholic acid, GUDCA: glyoursodeoxycholic acid, TUDCA: tauroursodeoxycholic

556 acid.

557

558

559

**A**

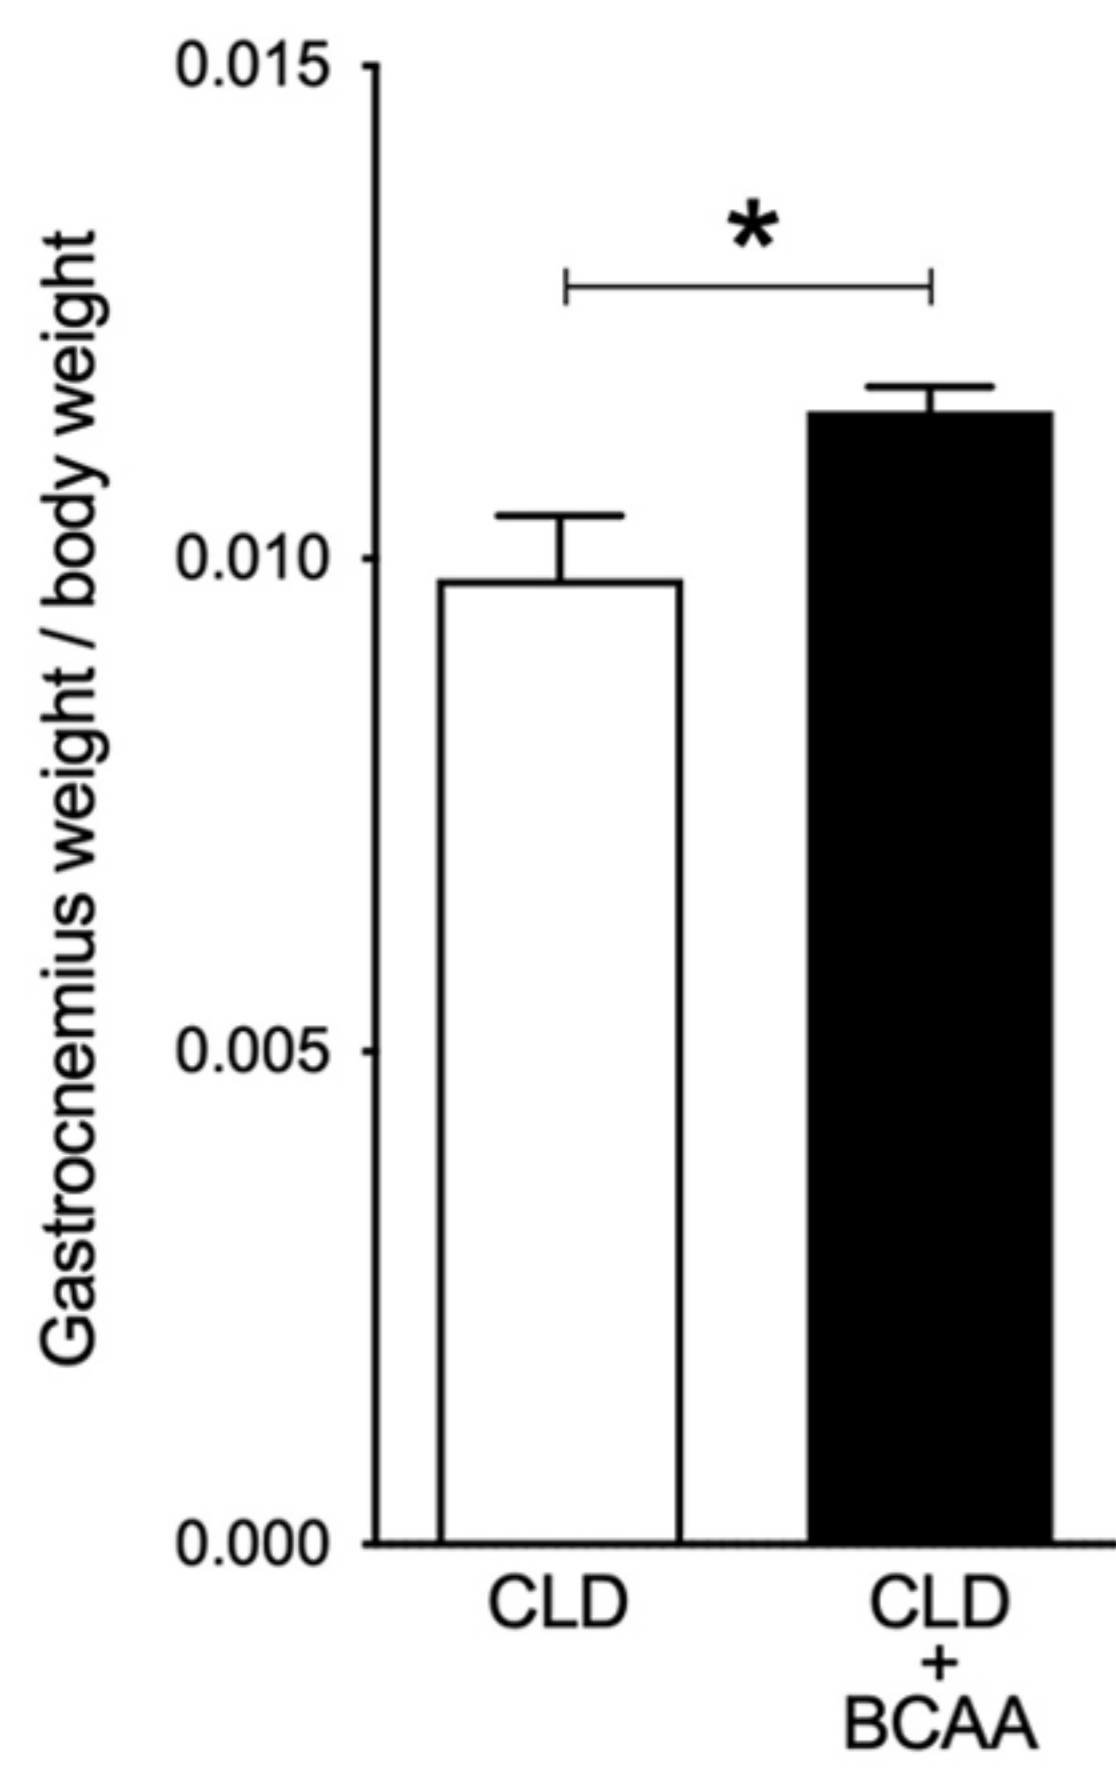

**B**

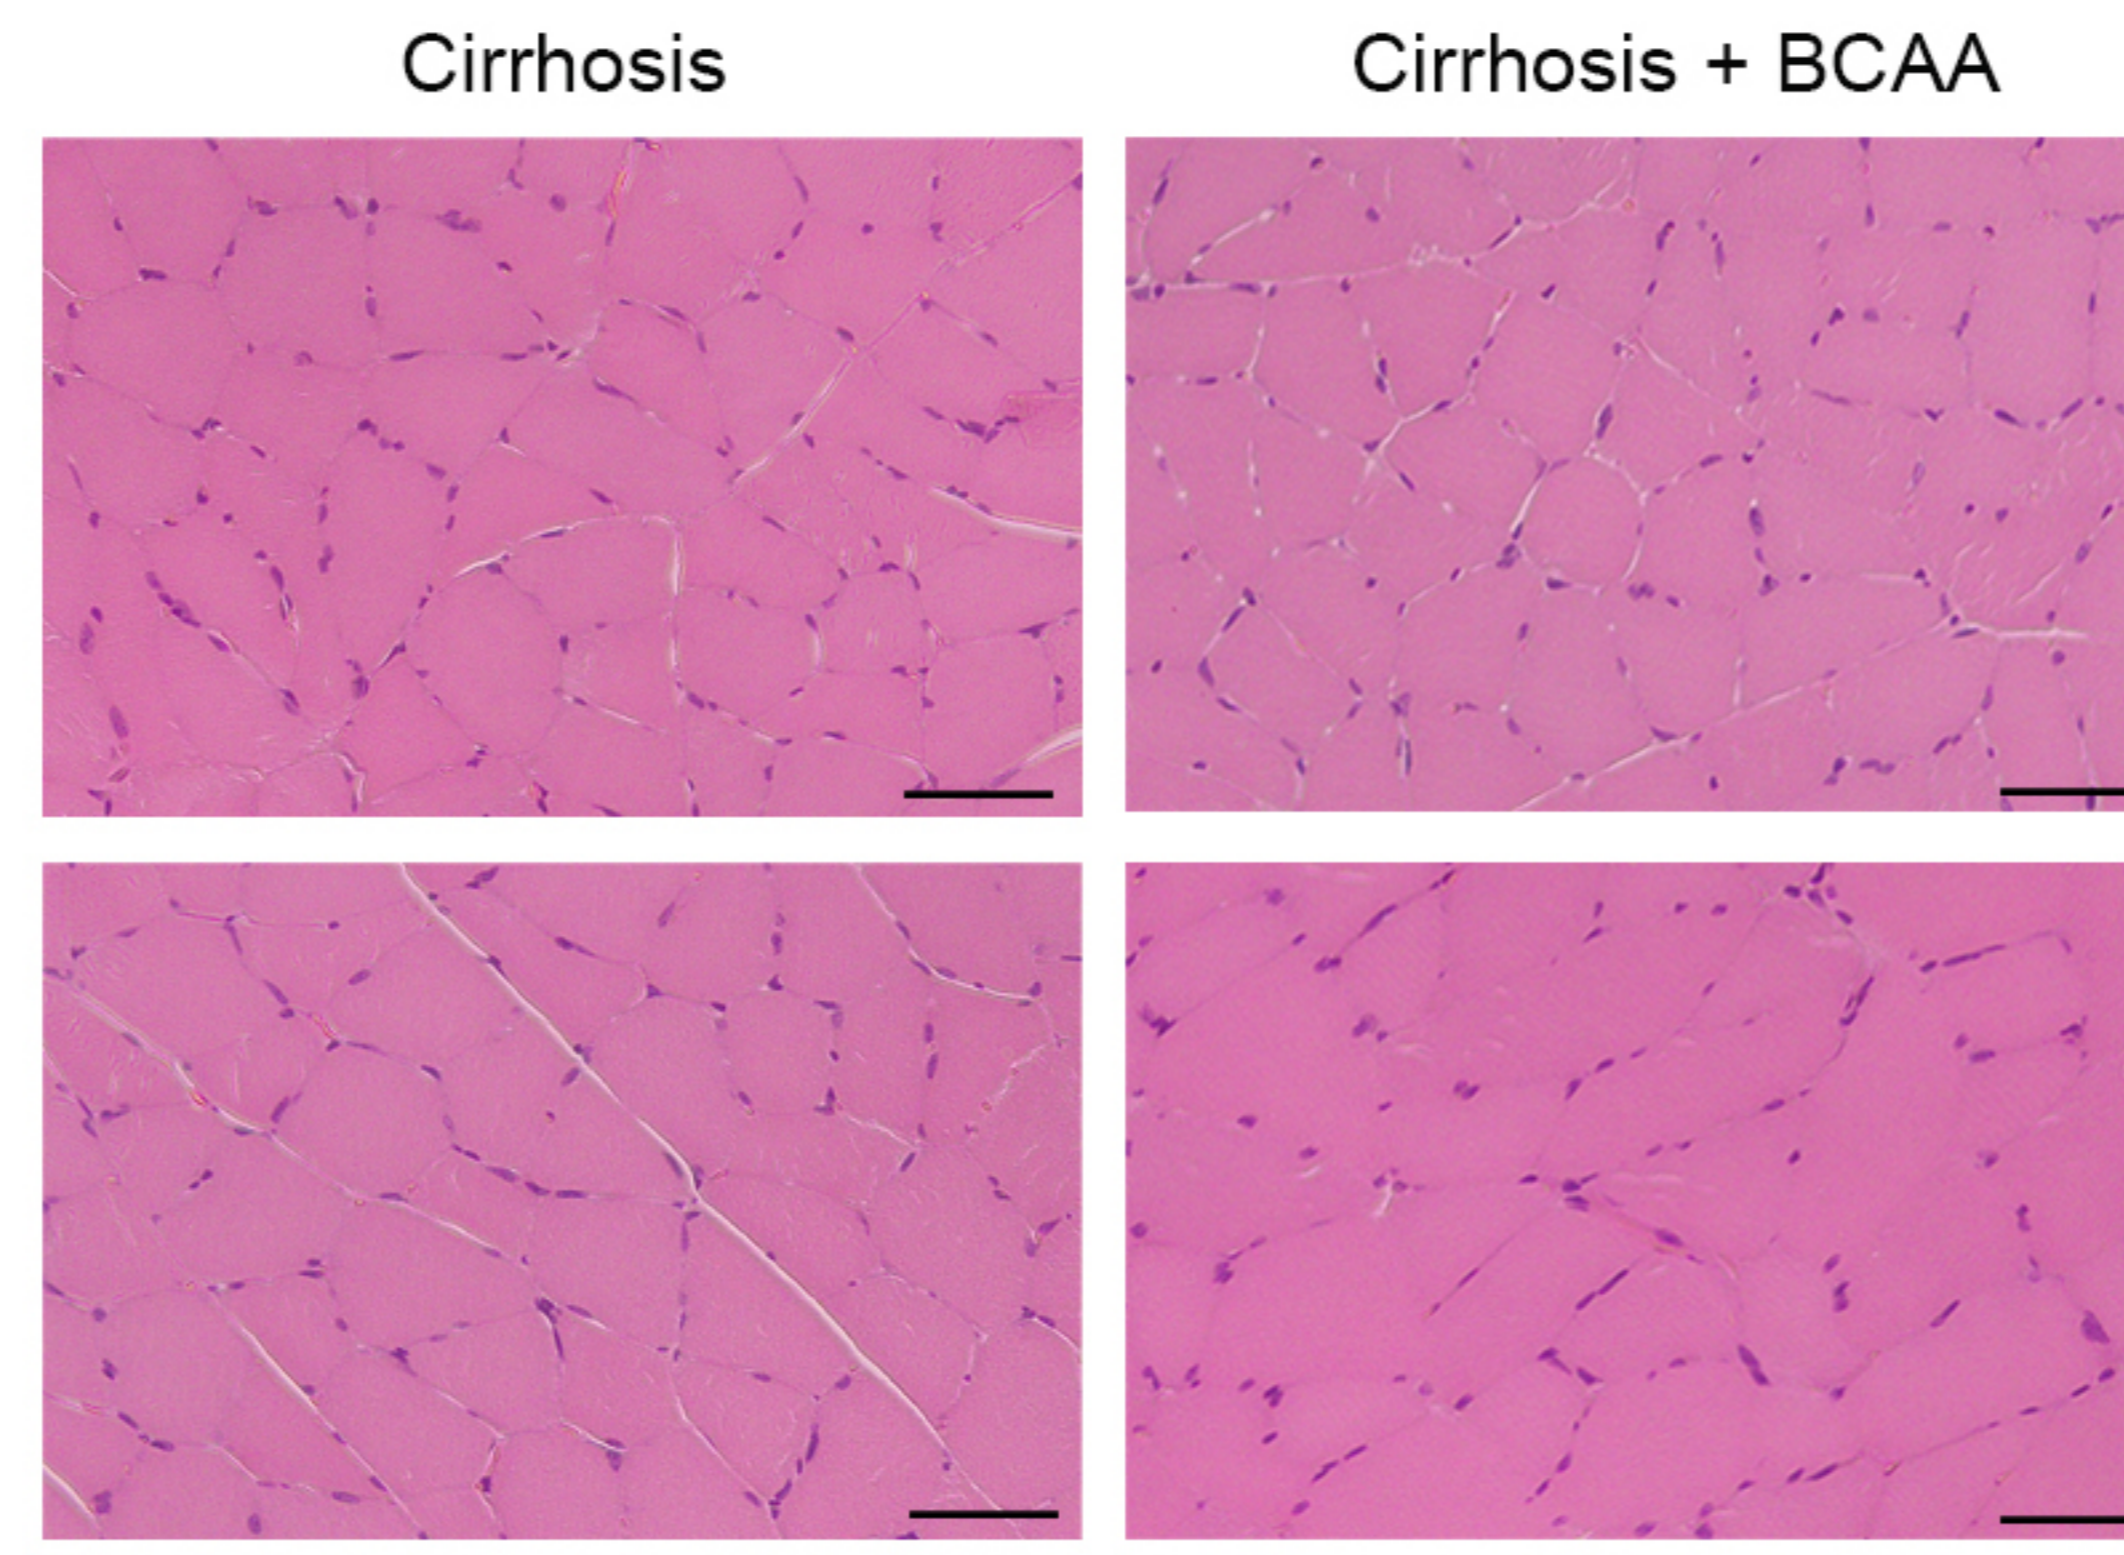

**C**

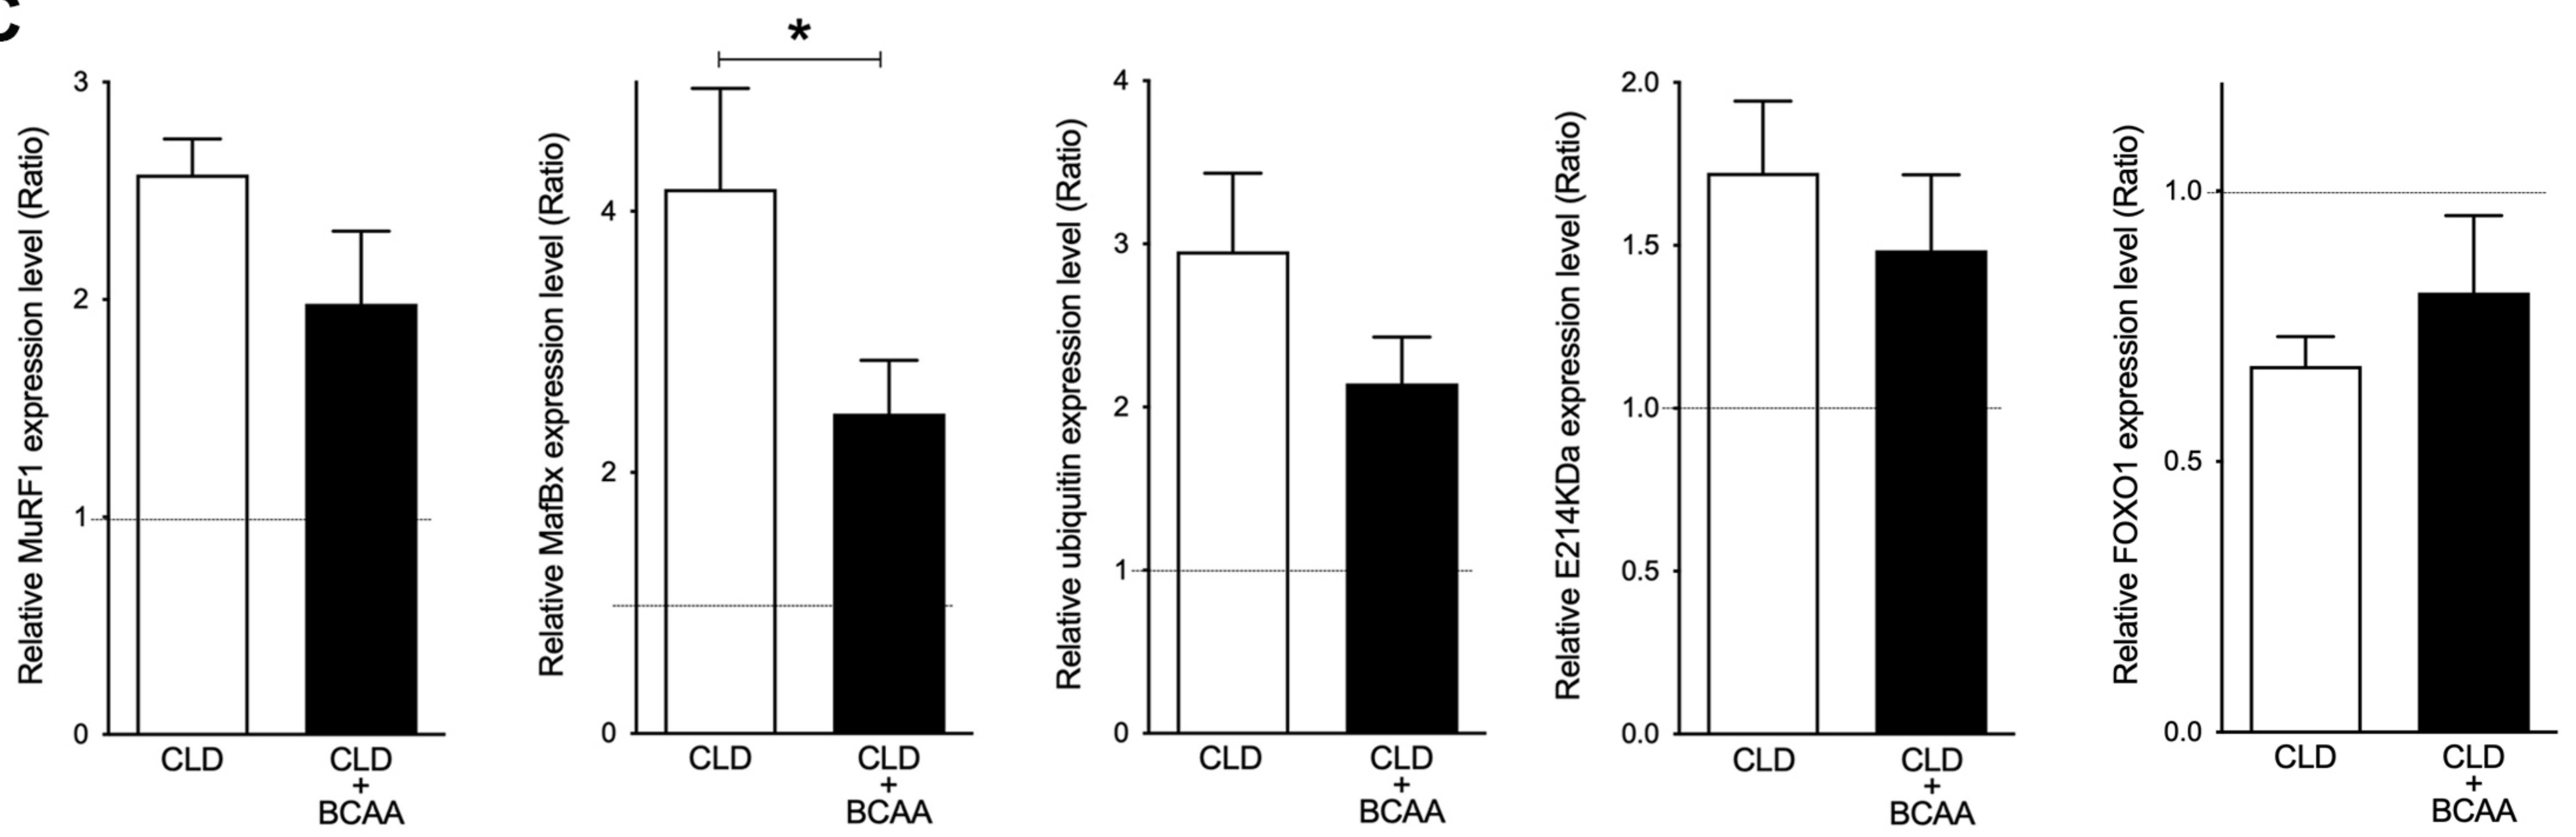

**D**

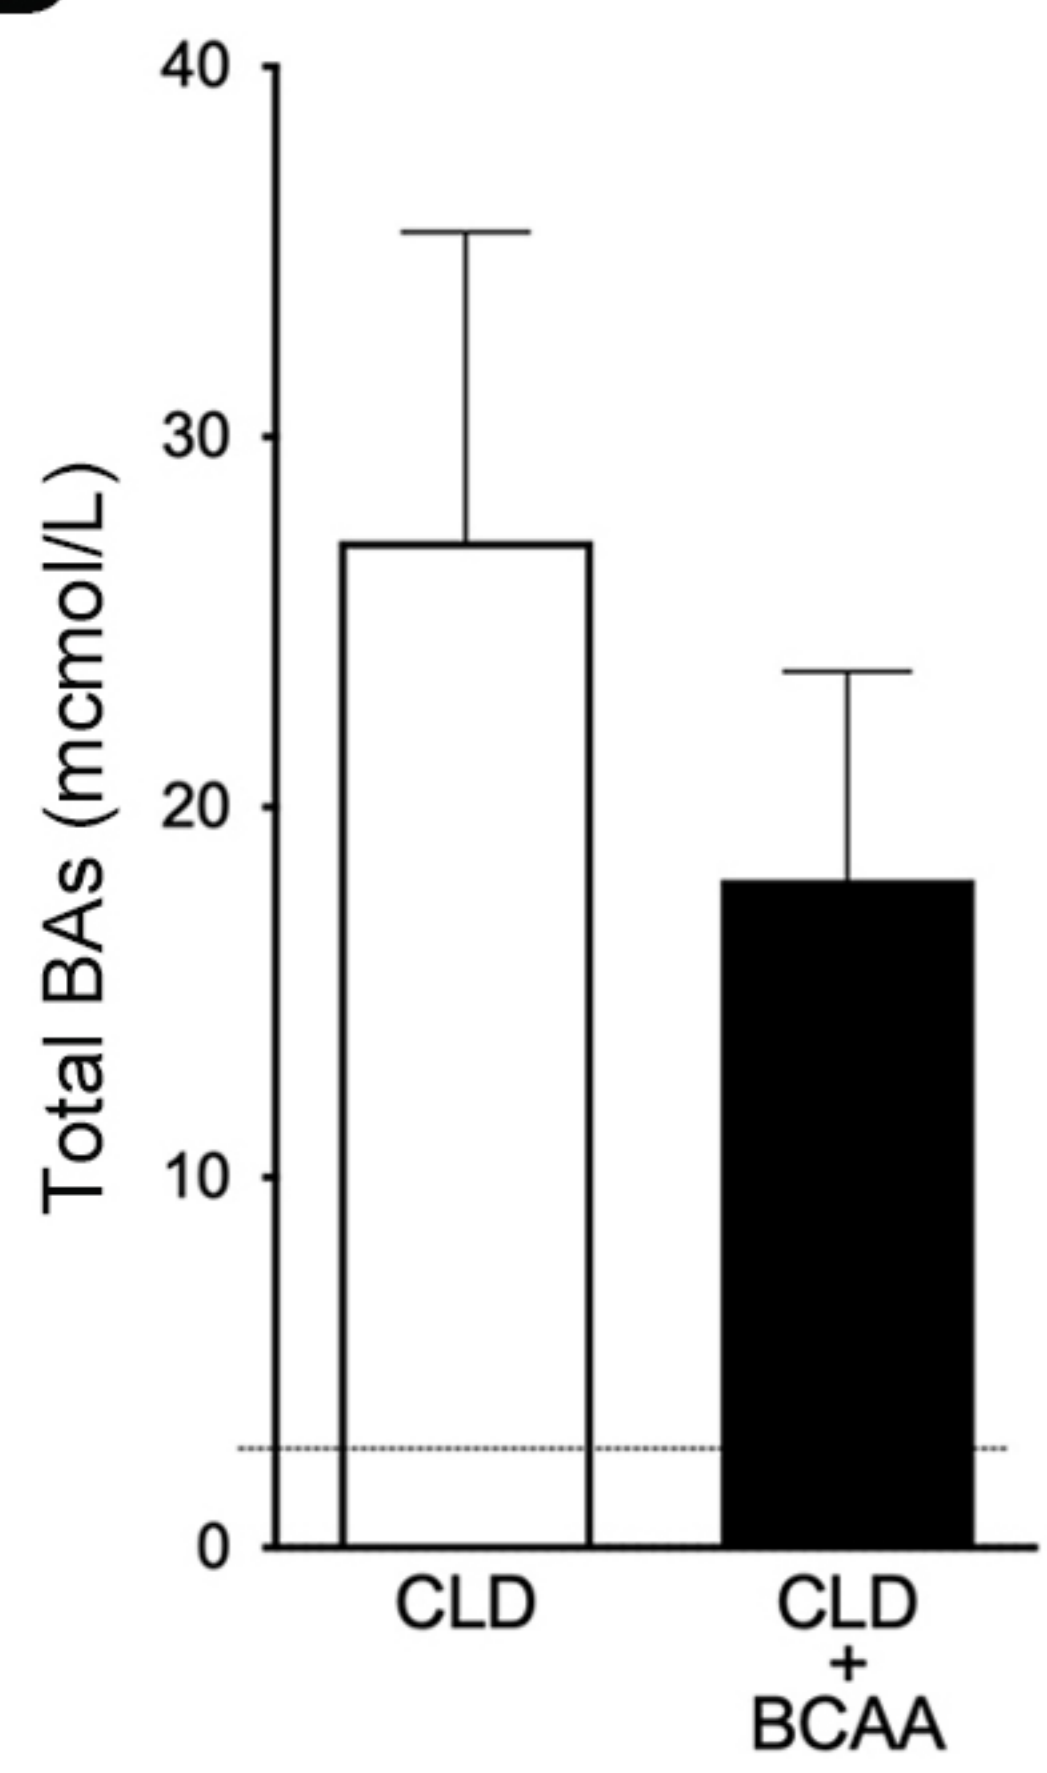

**E**

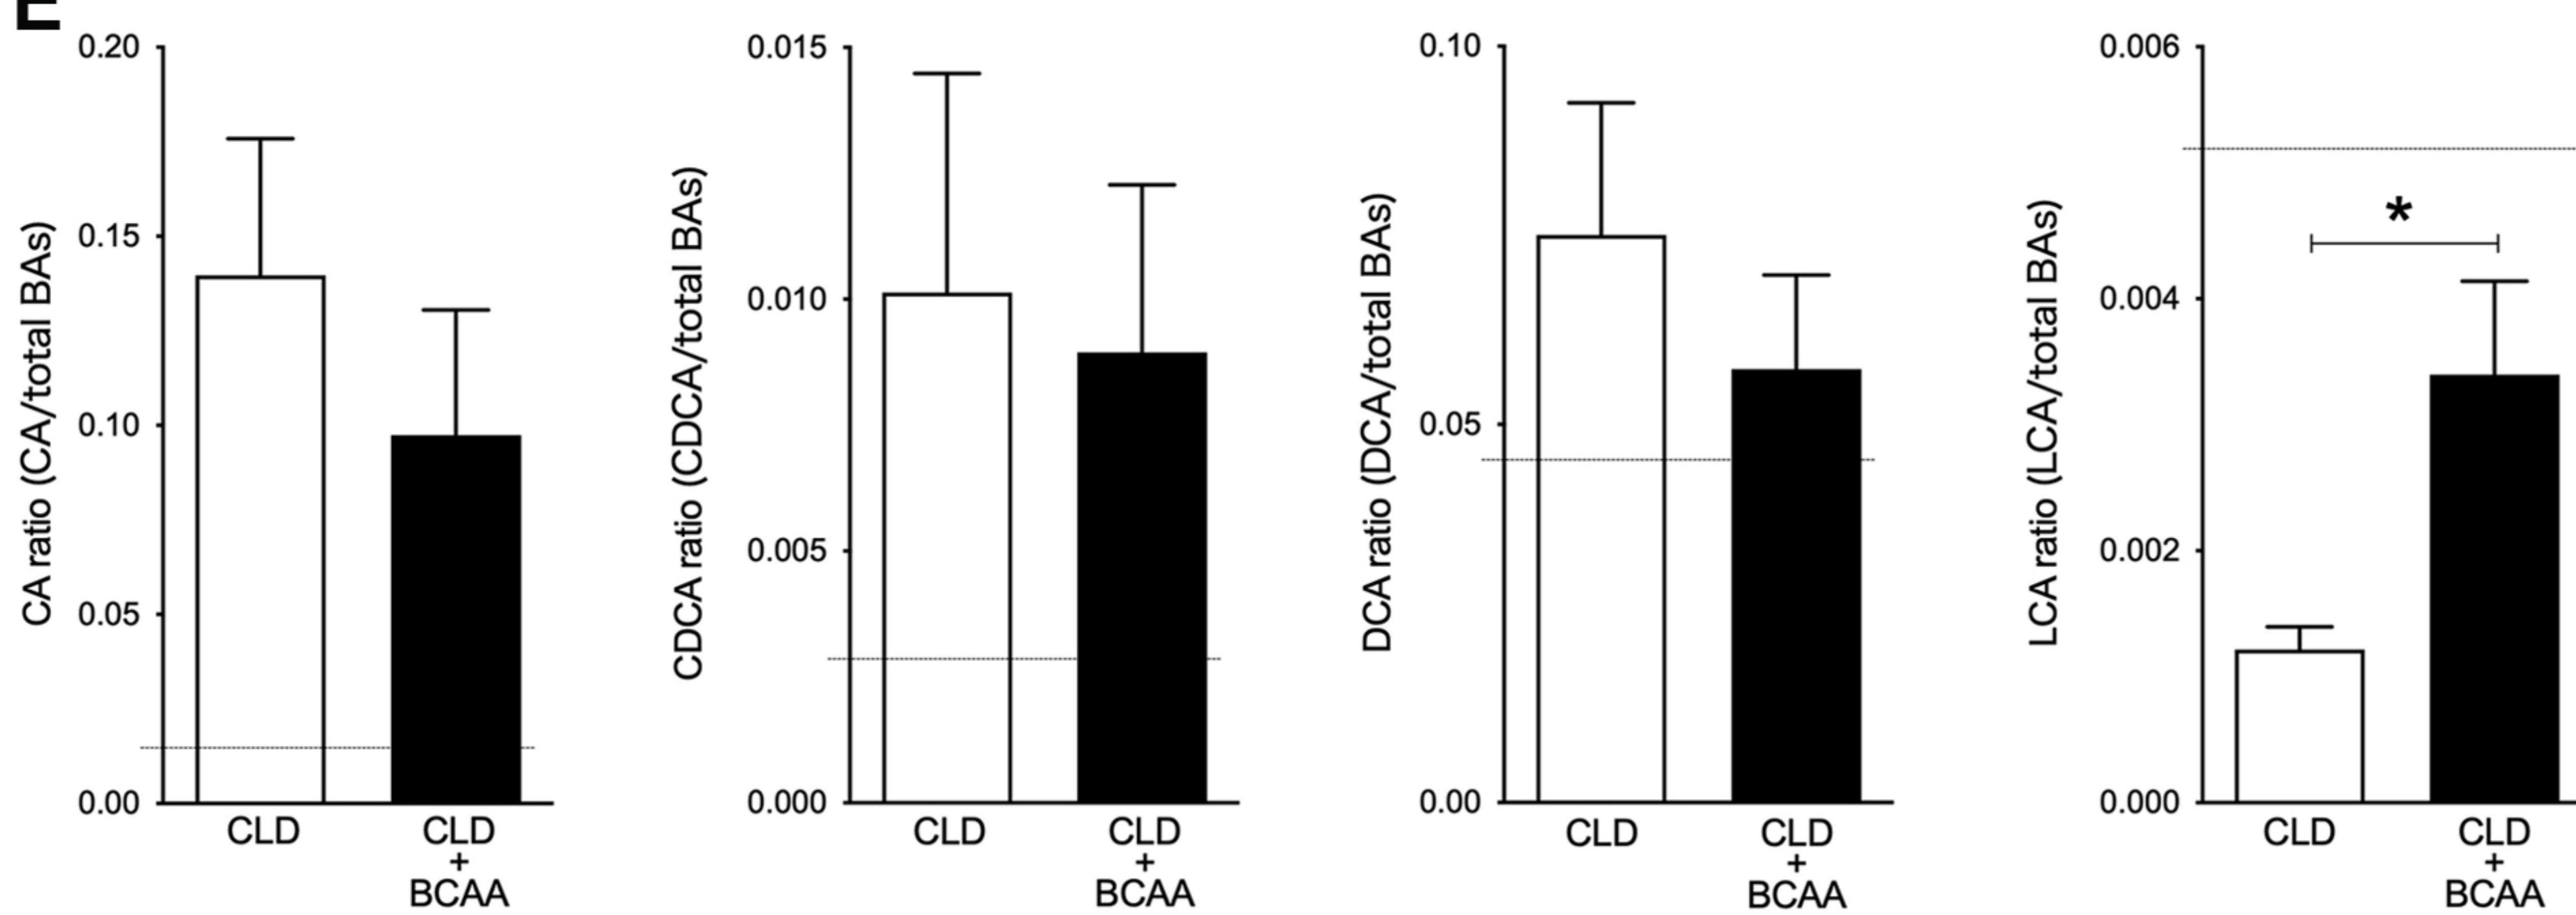

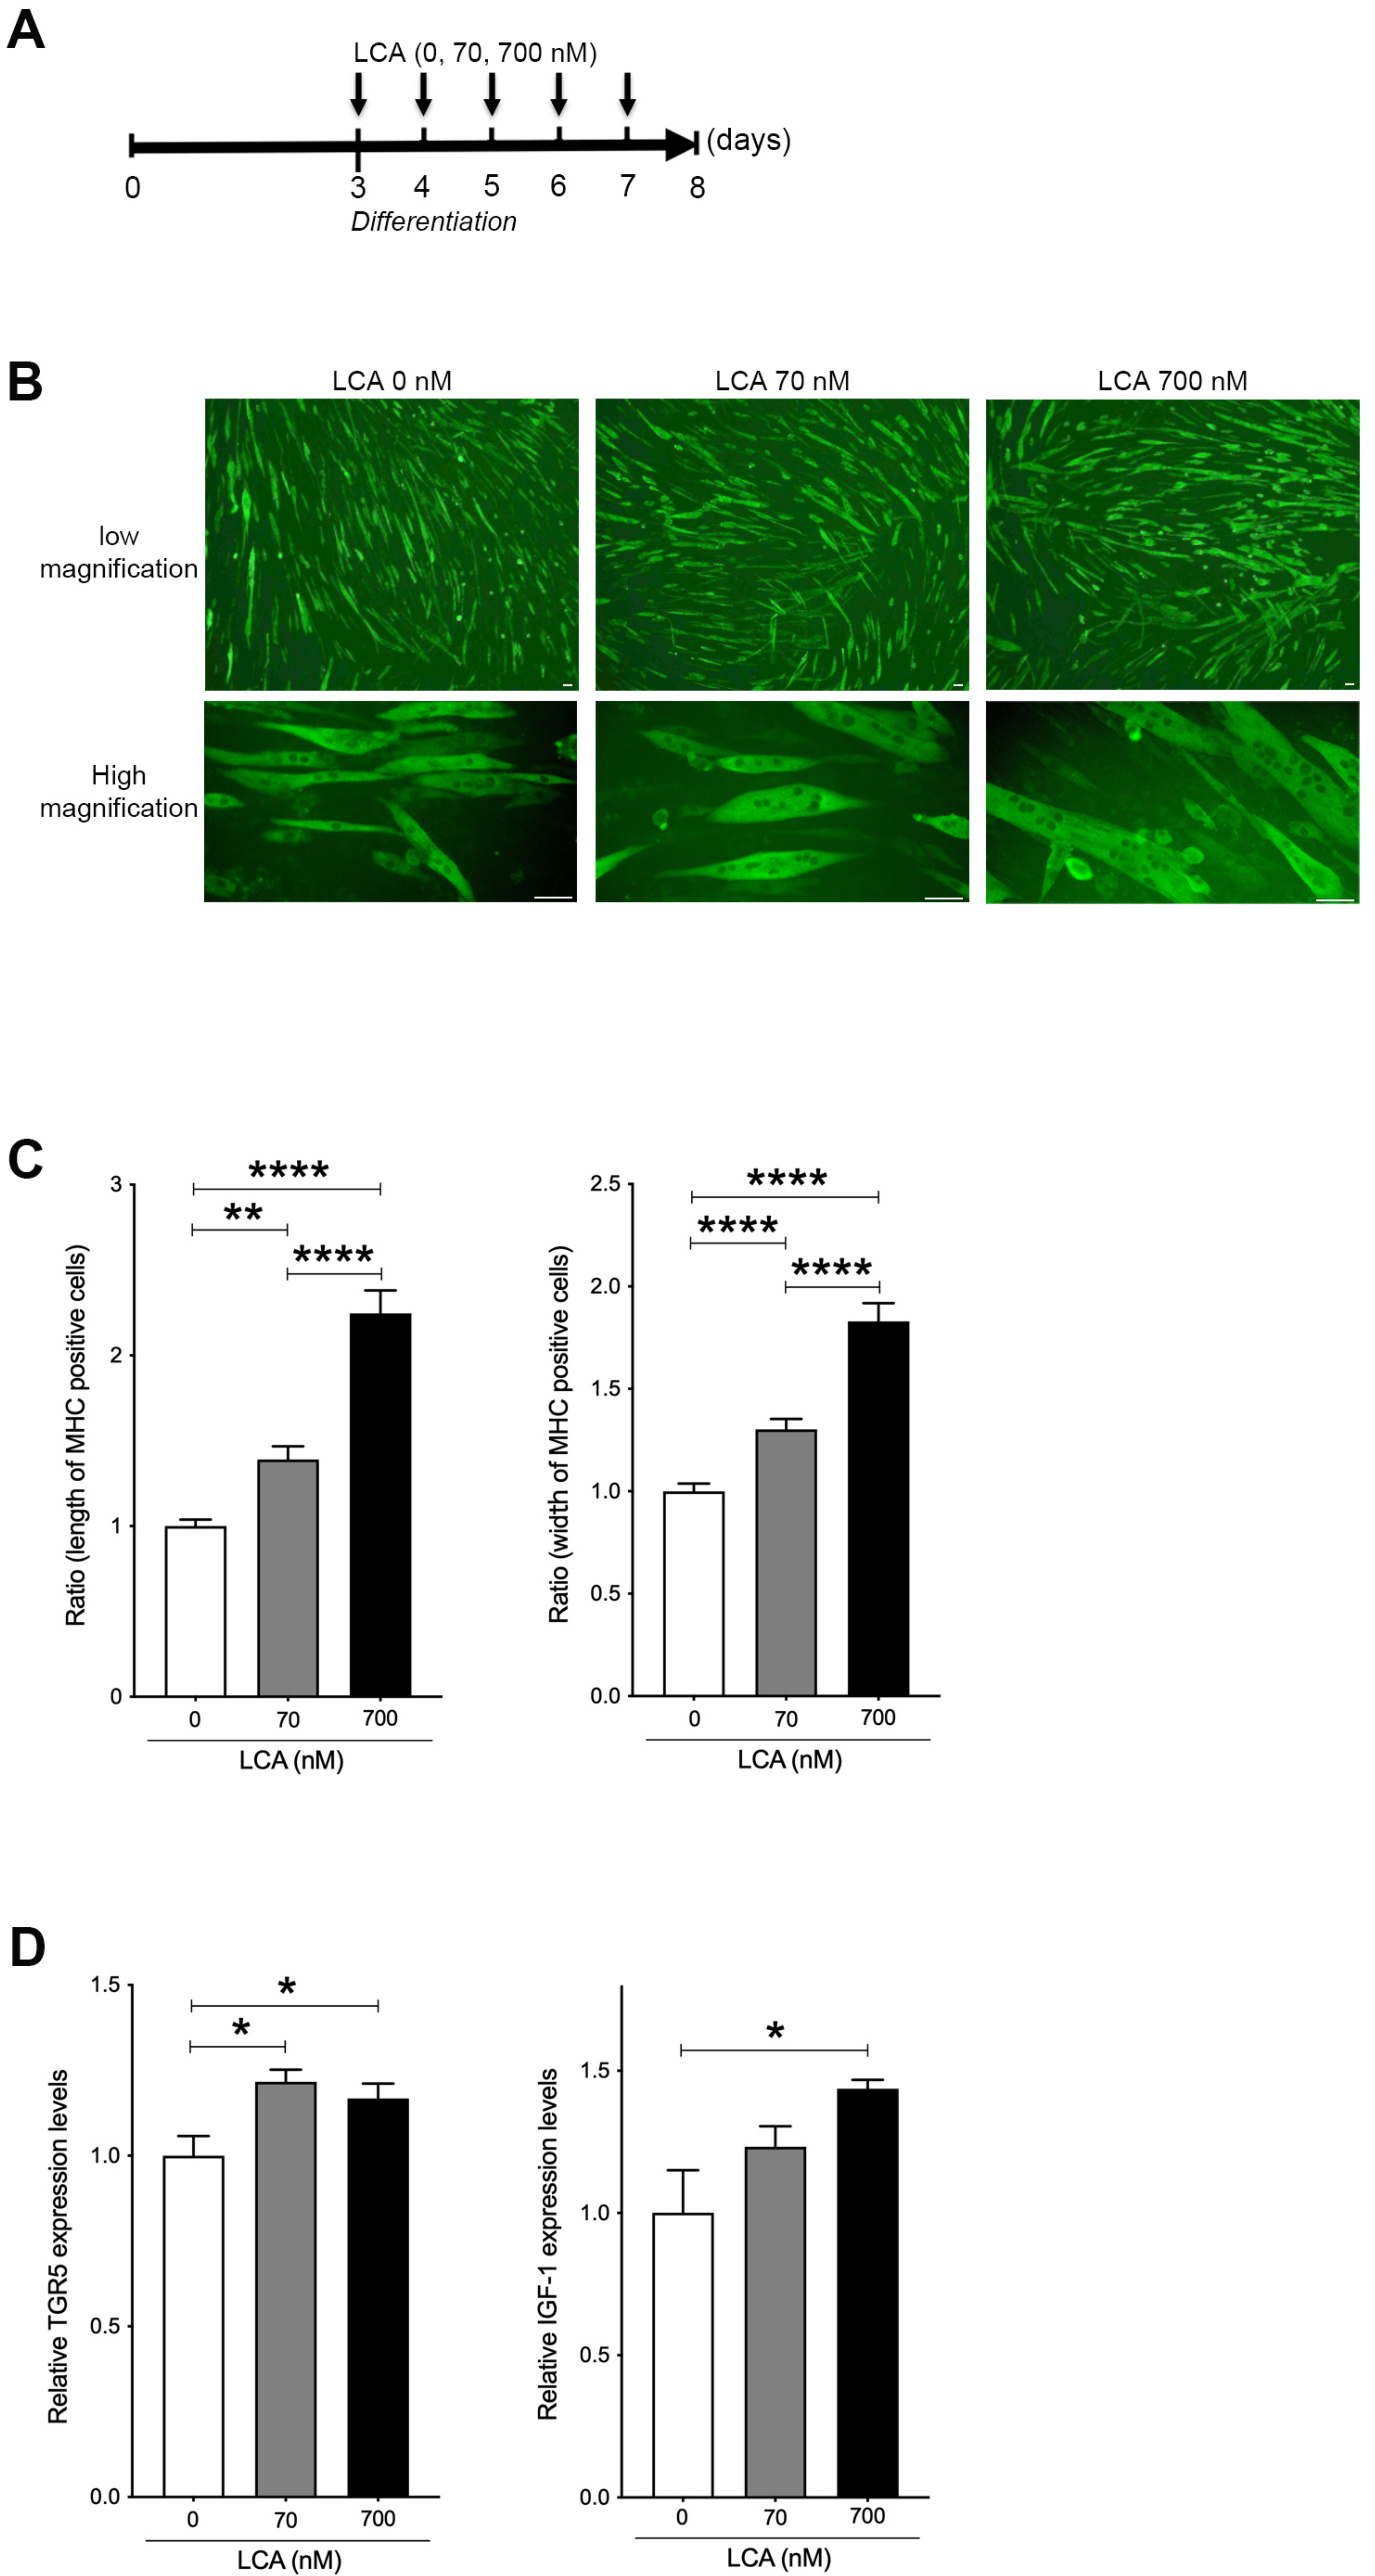

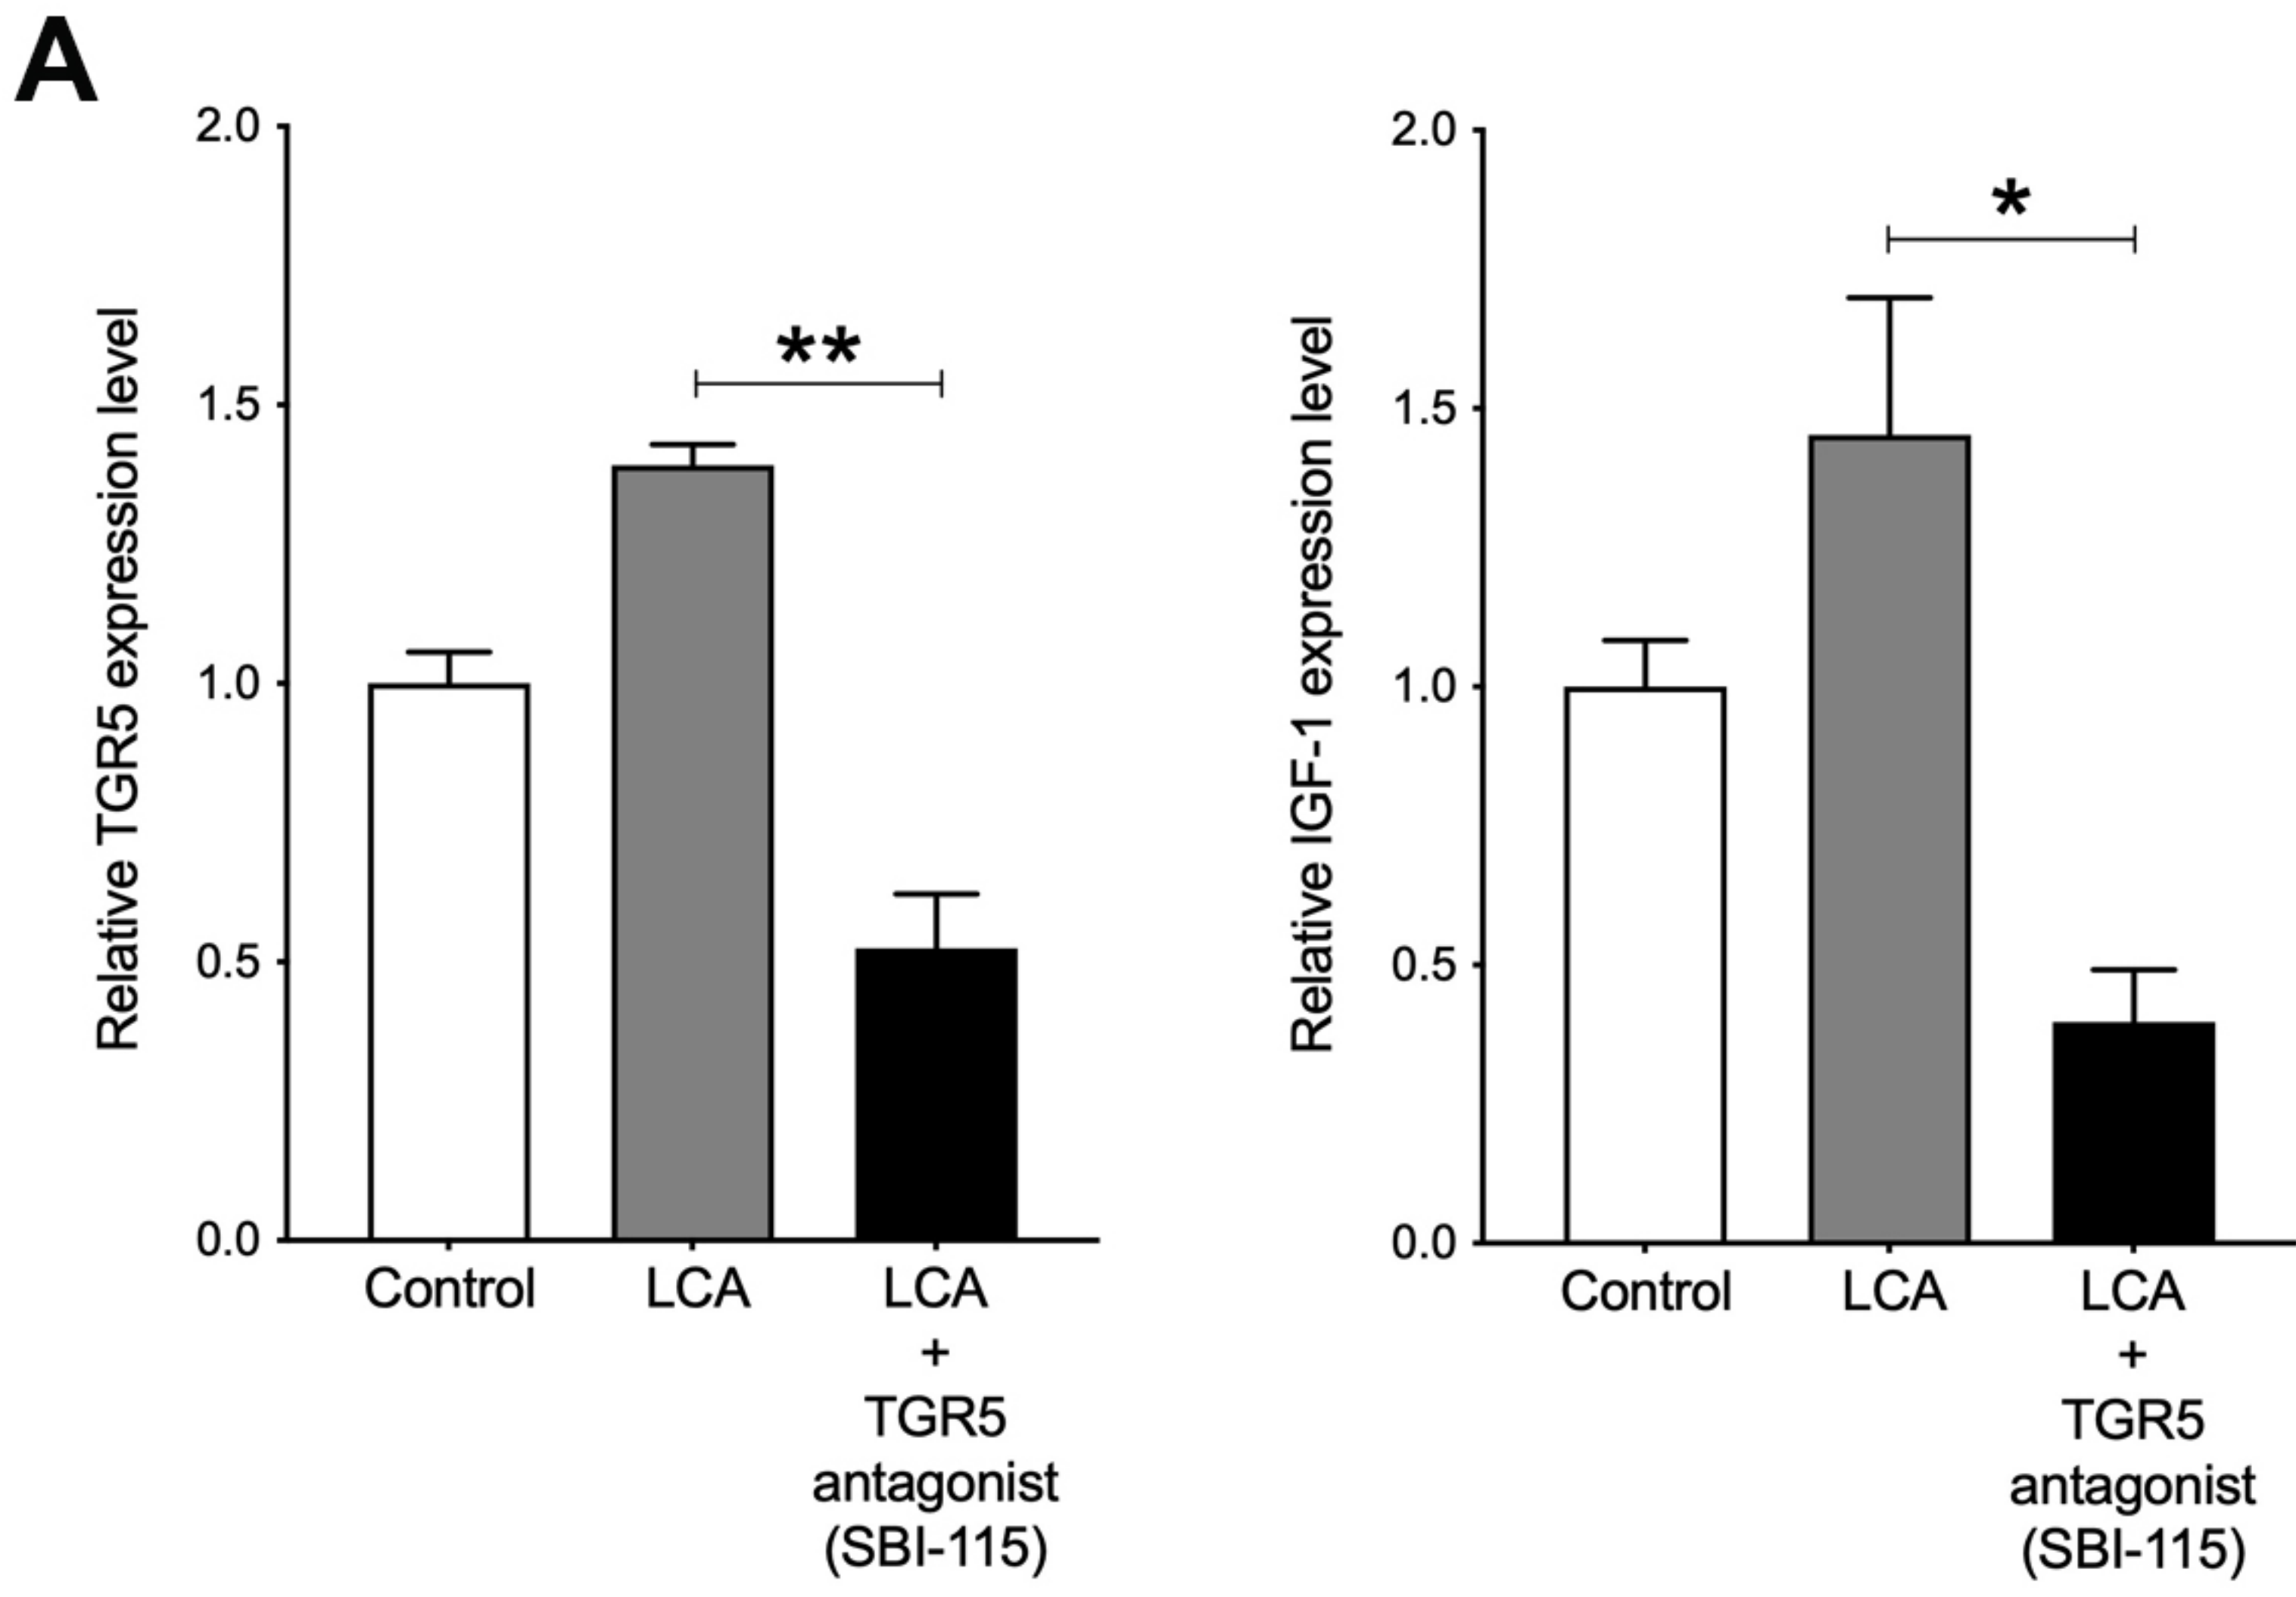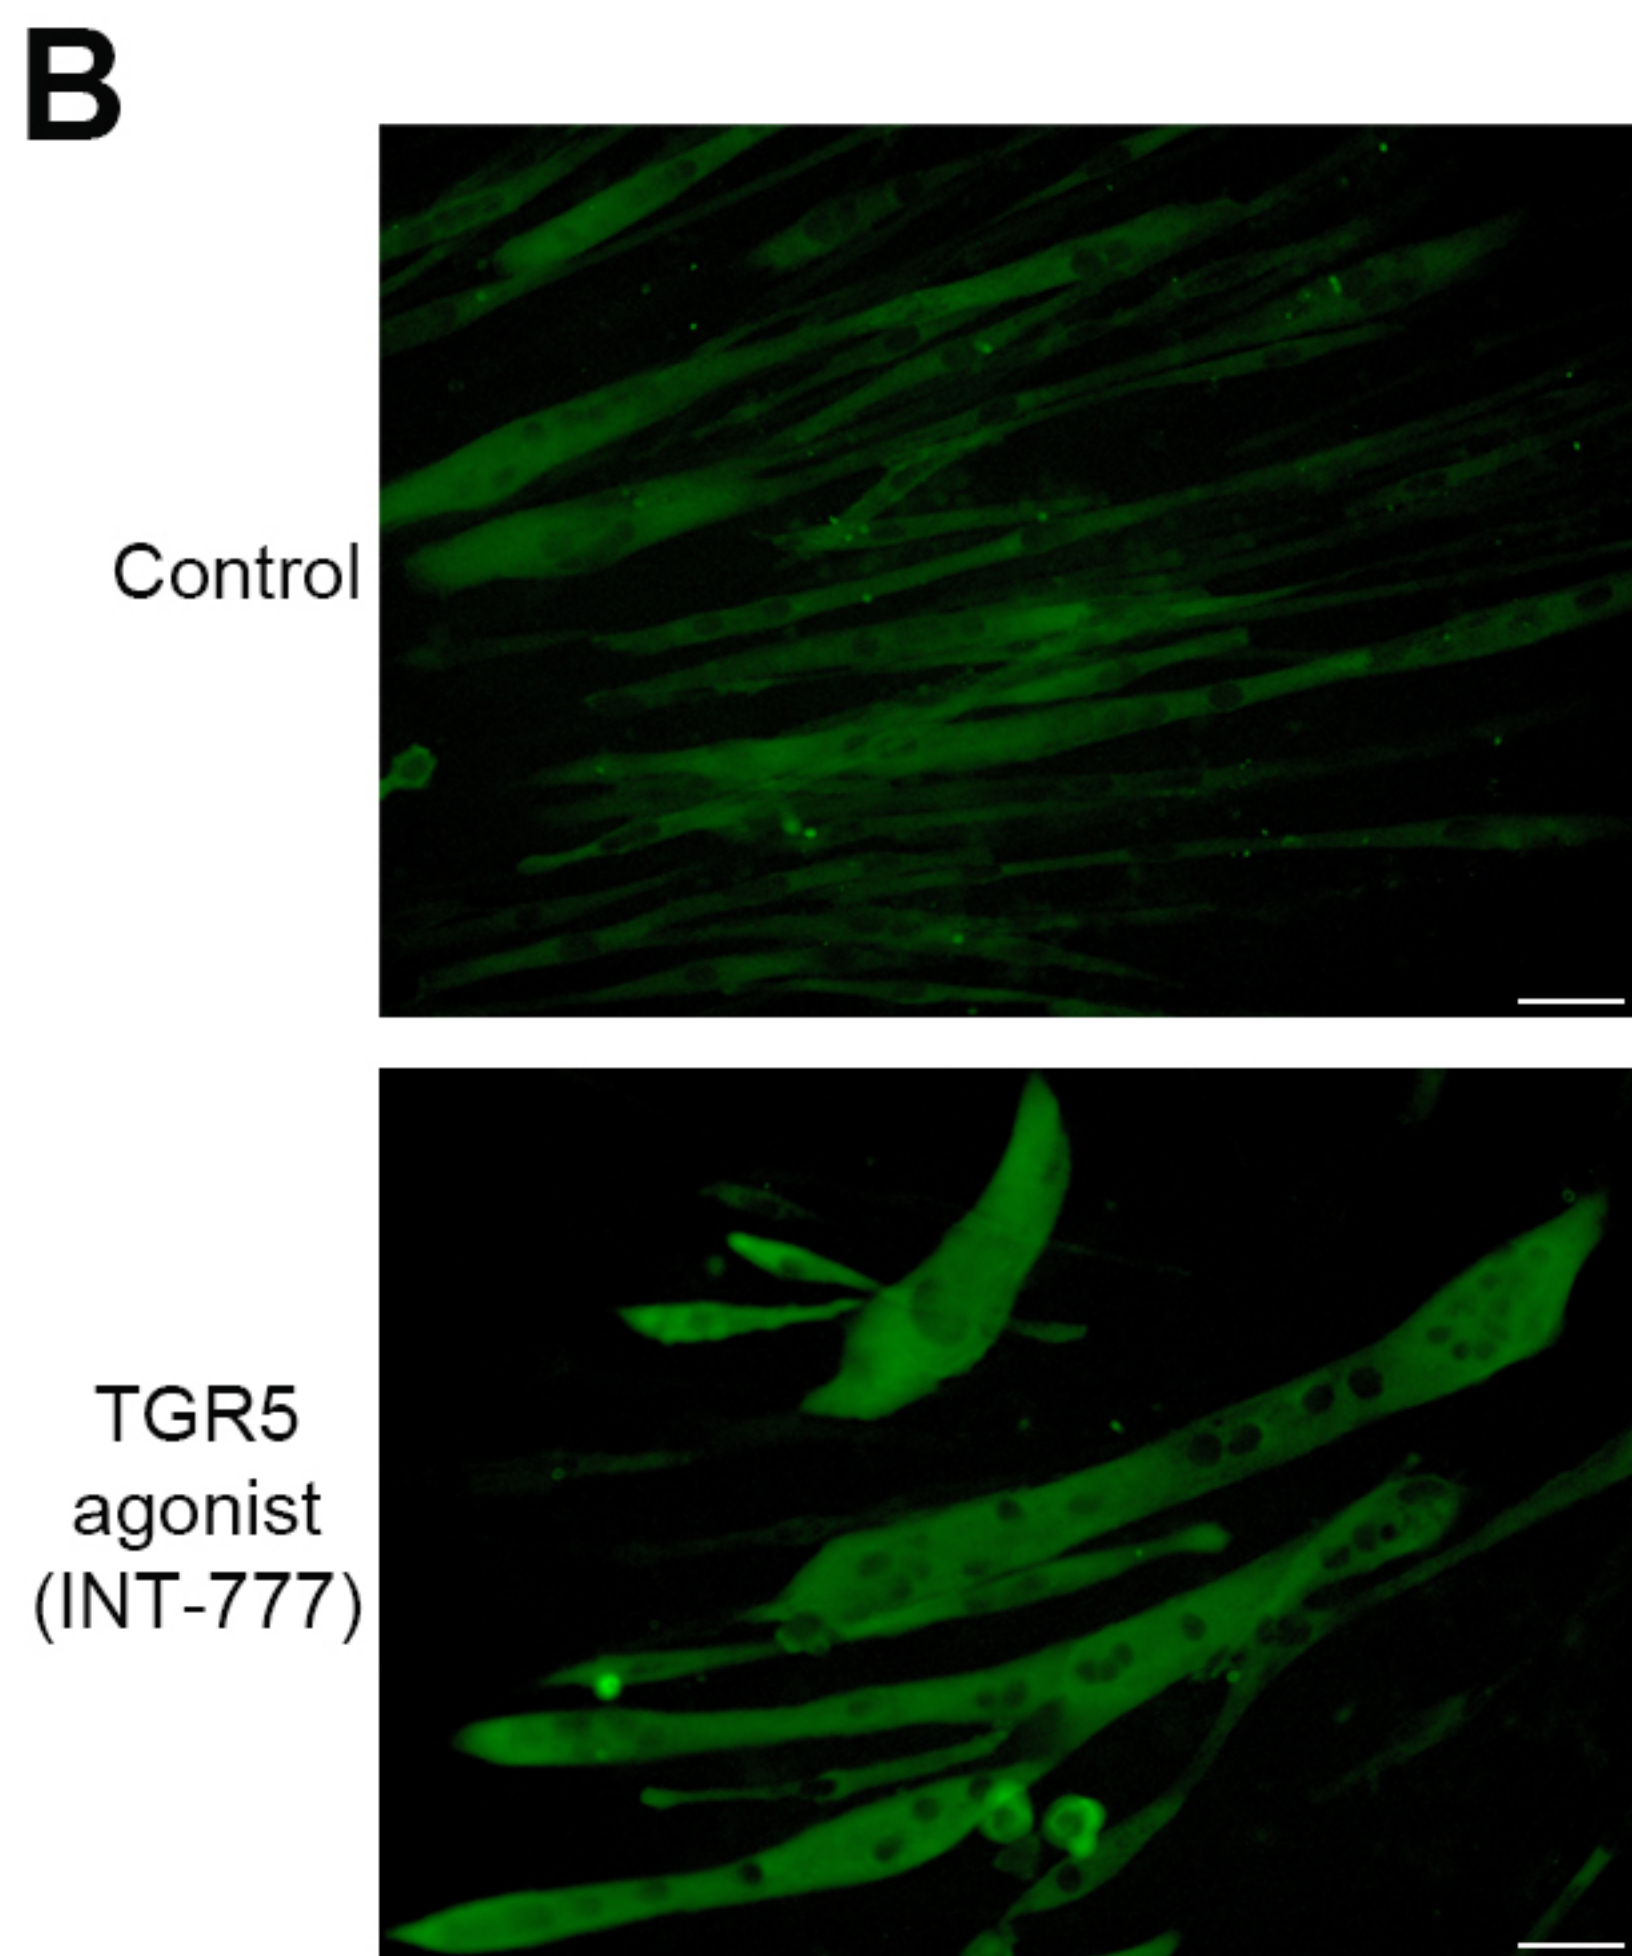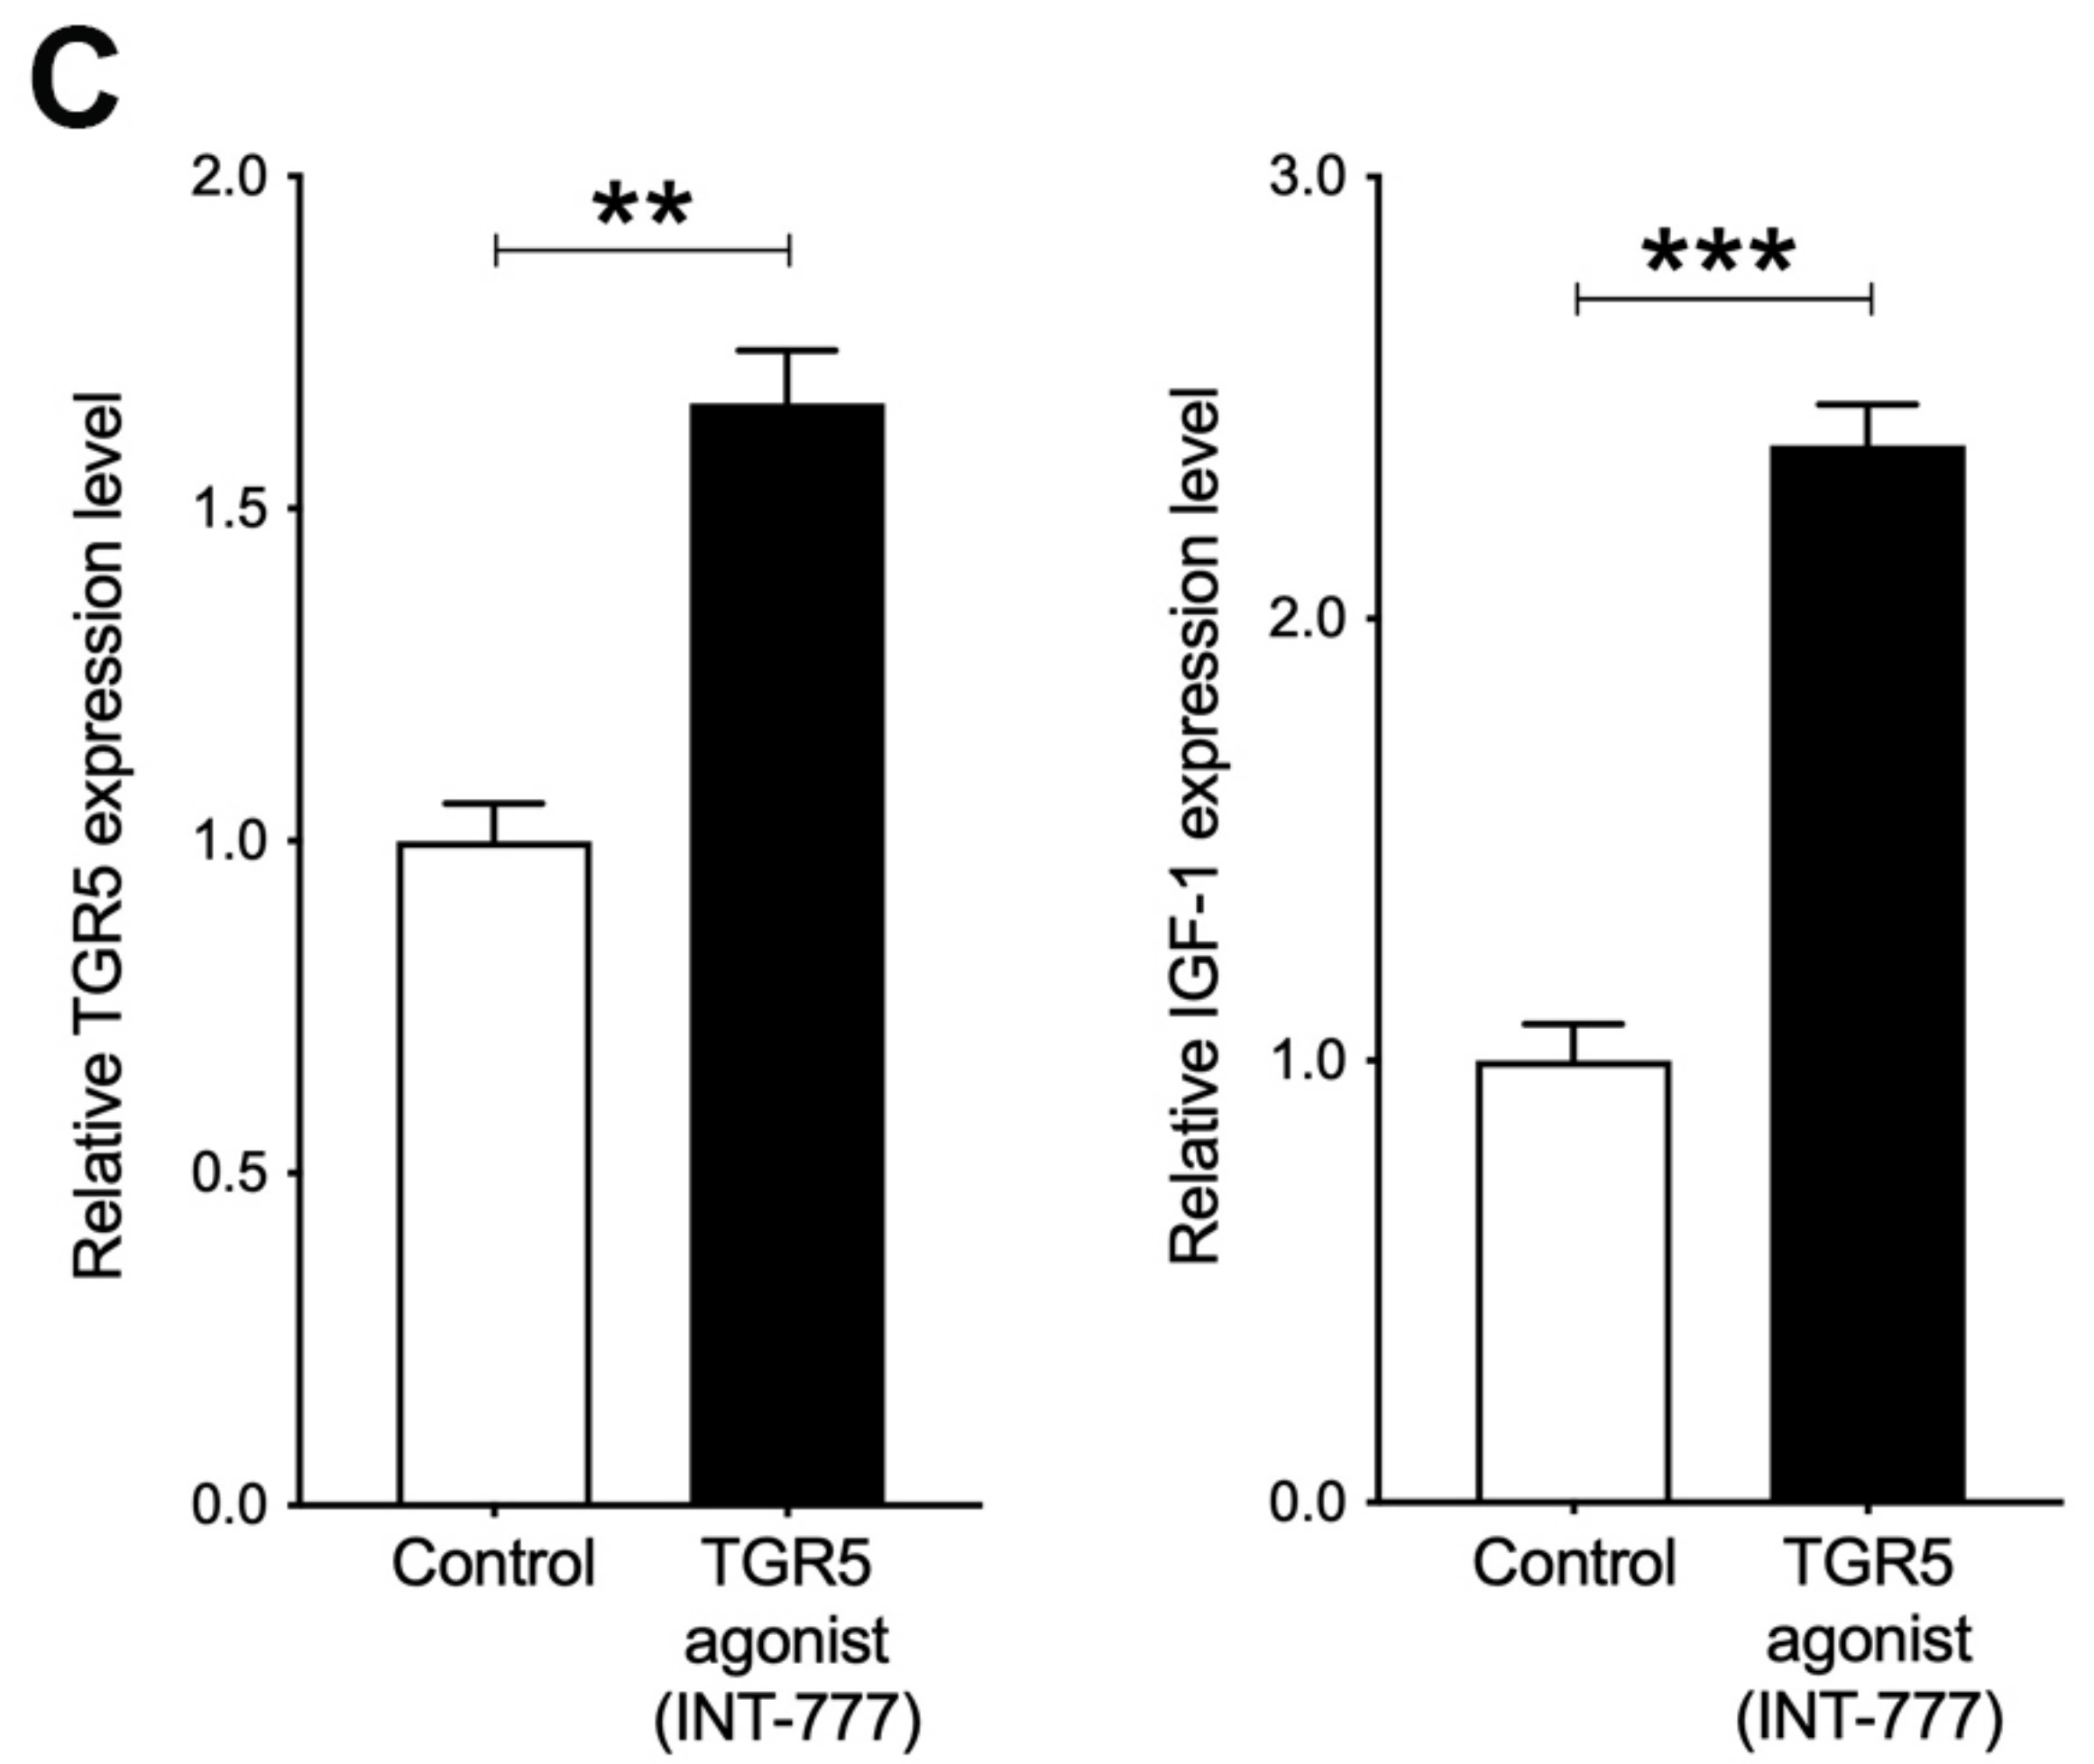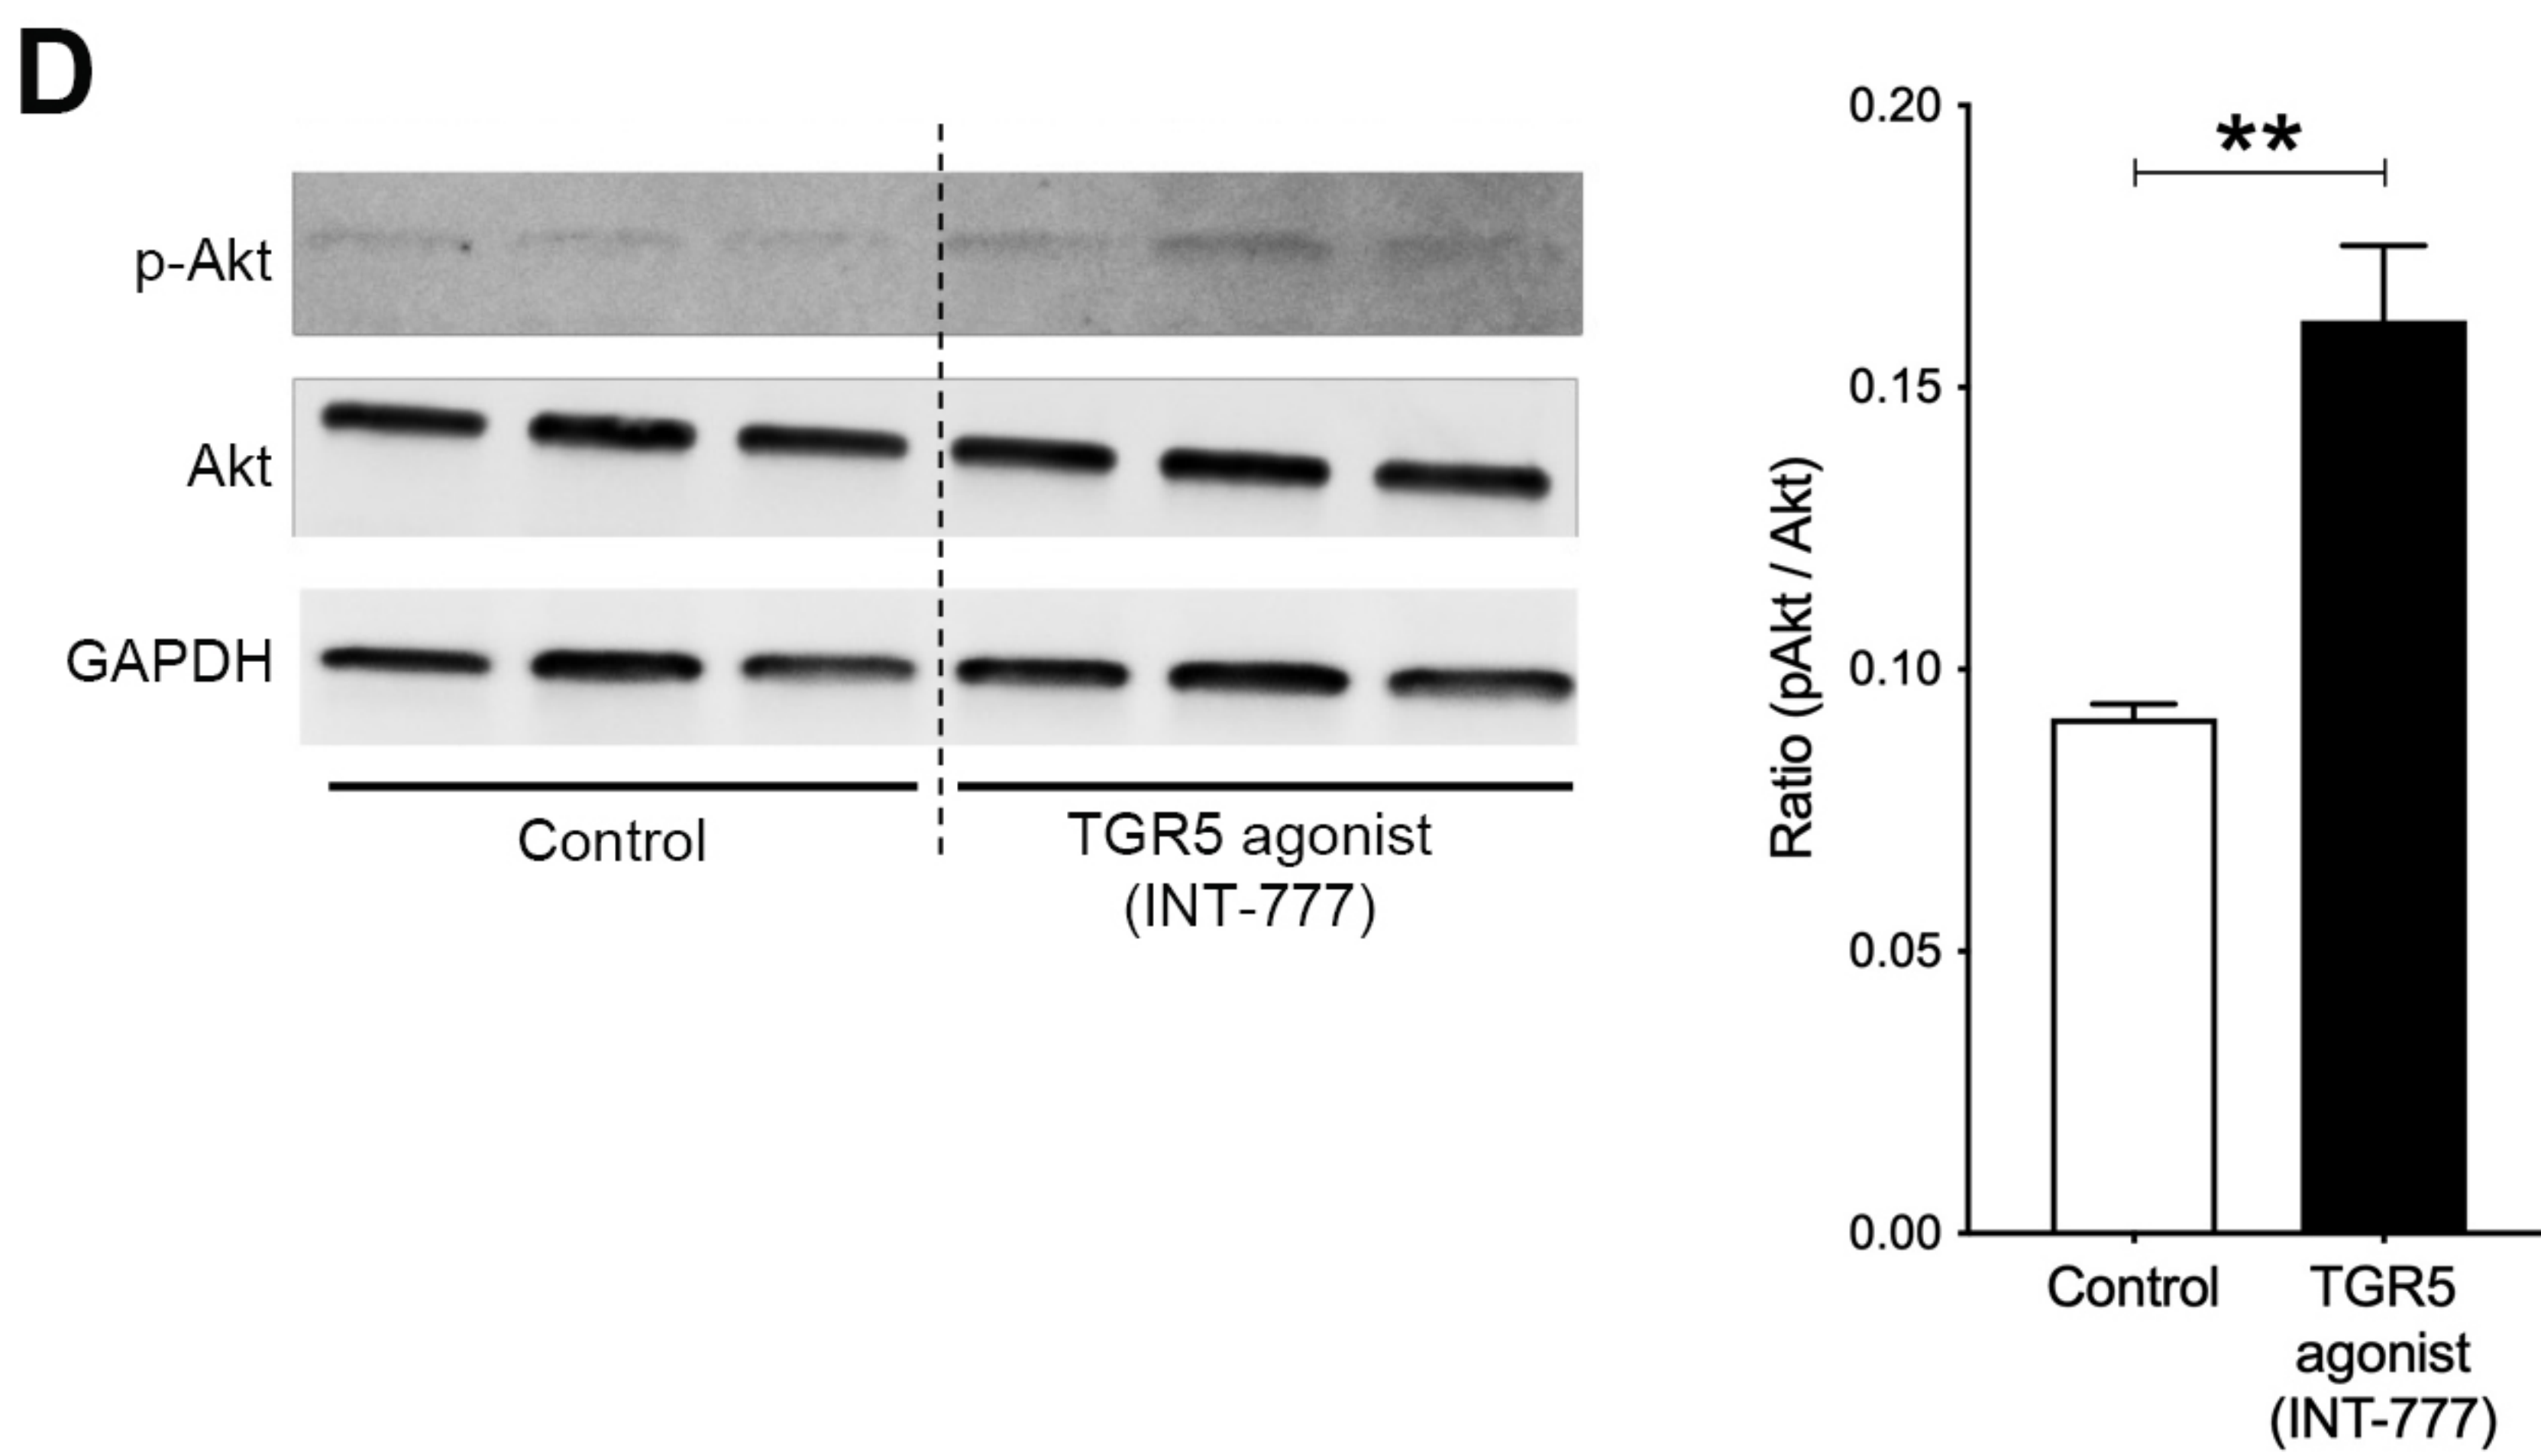



**A**

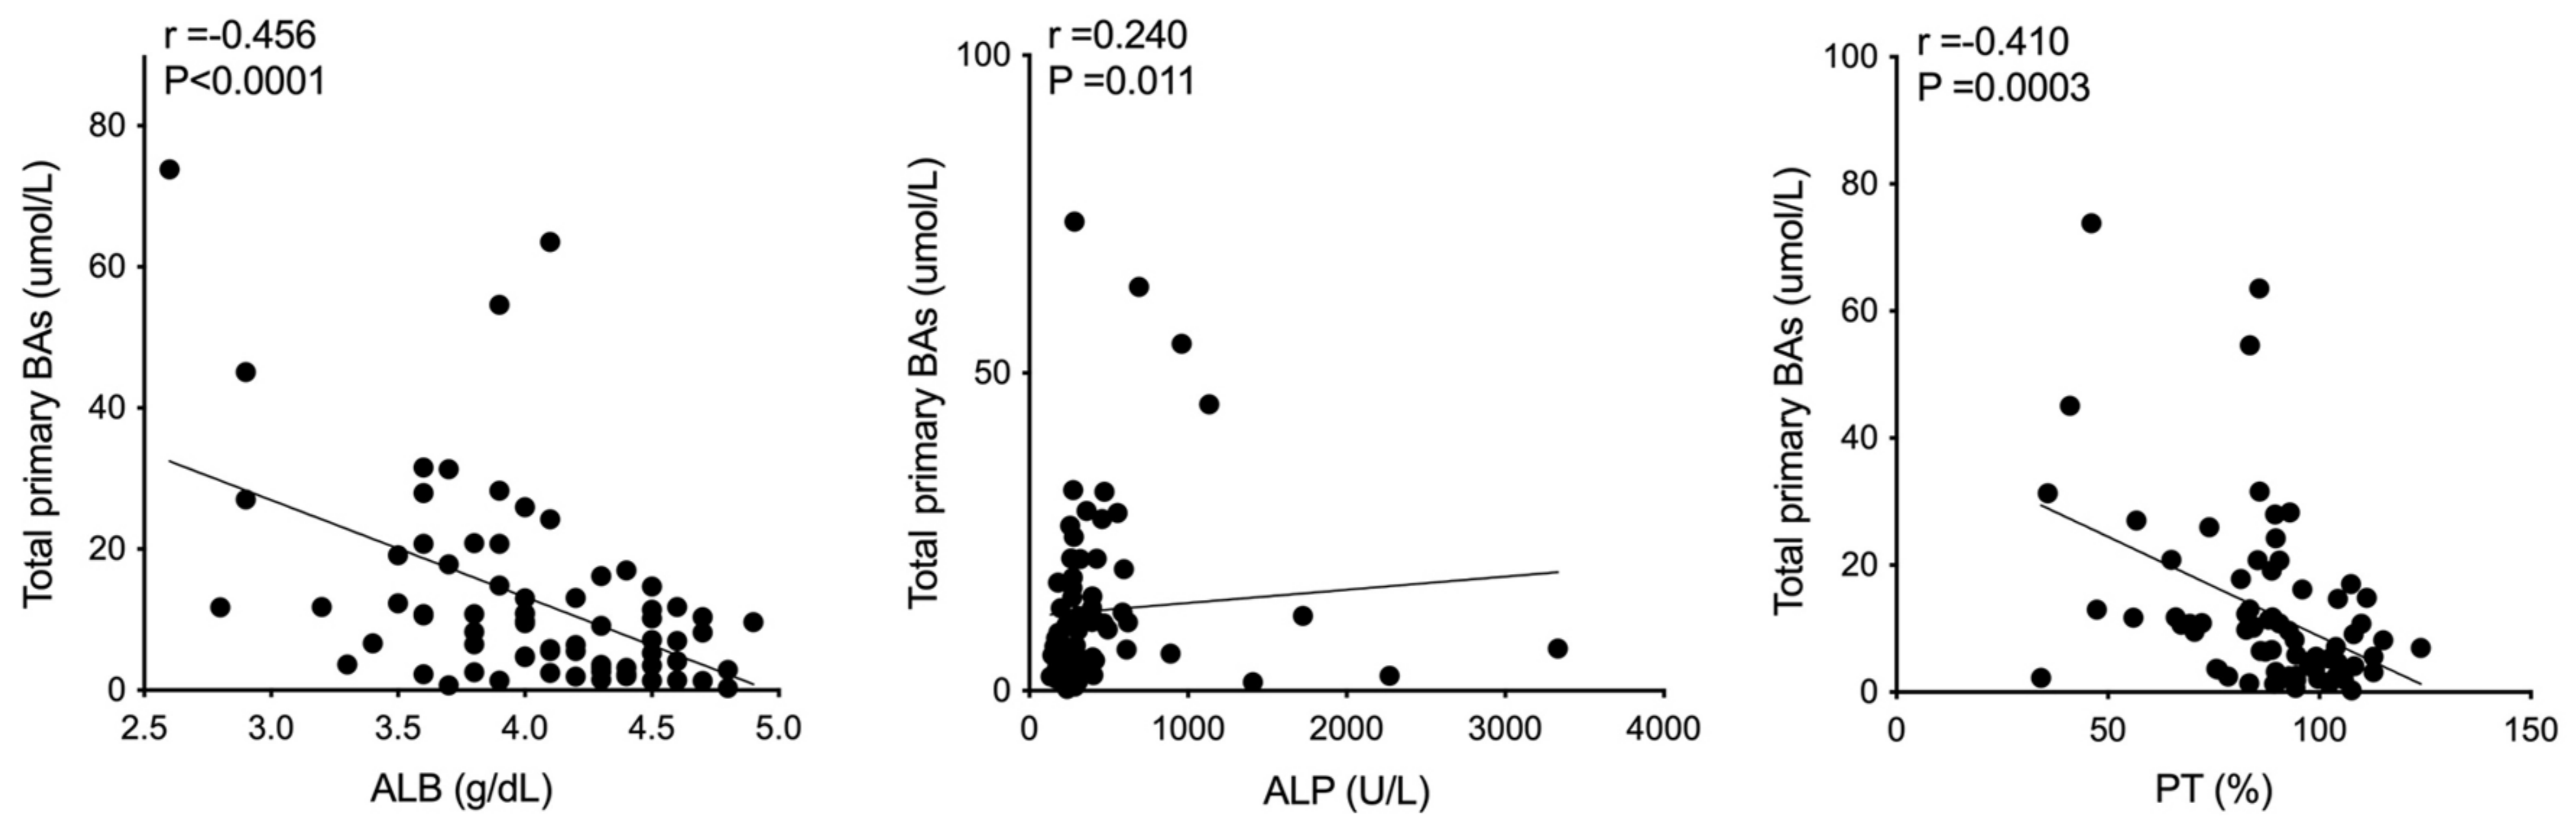

**B**

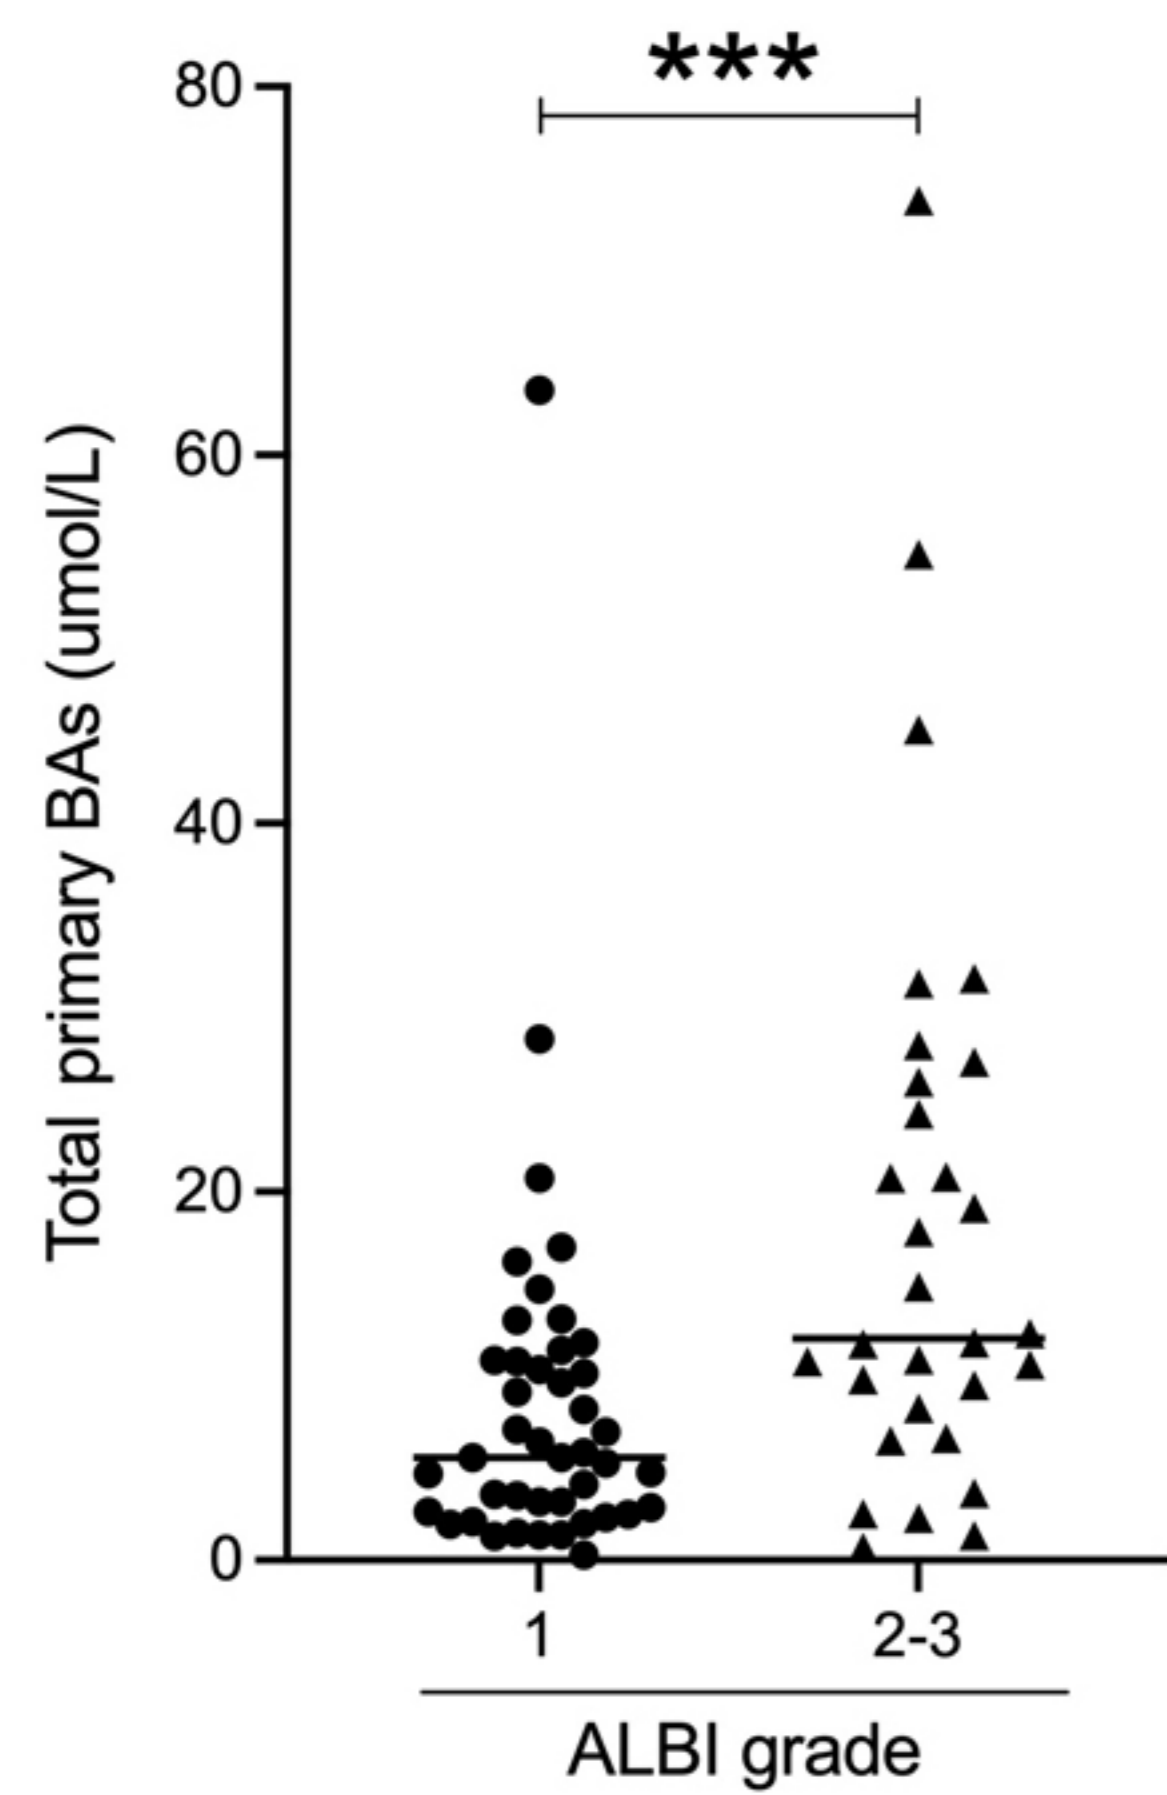

**C**

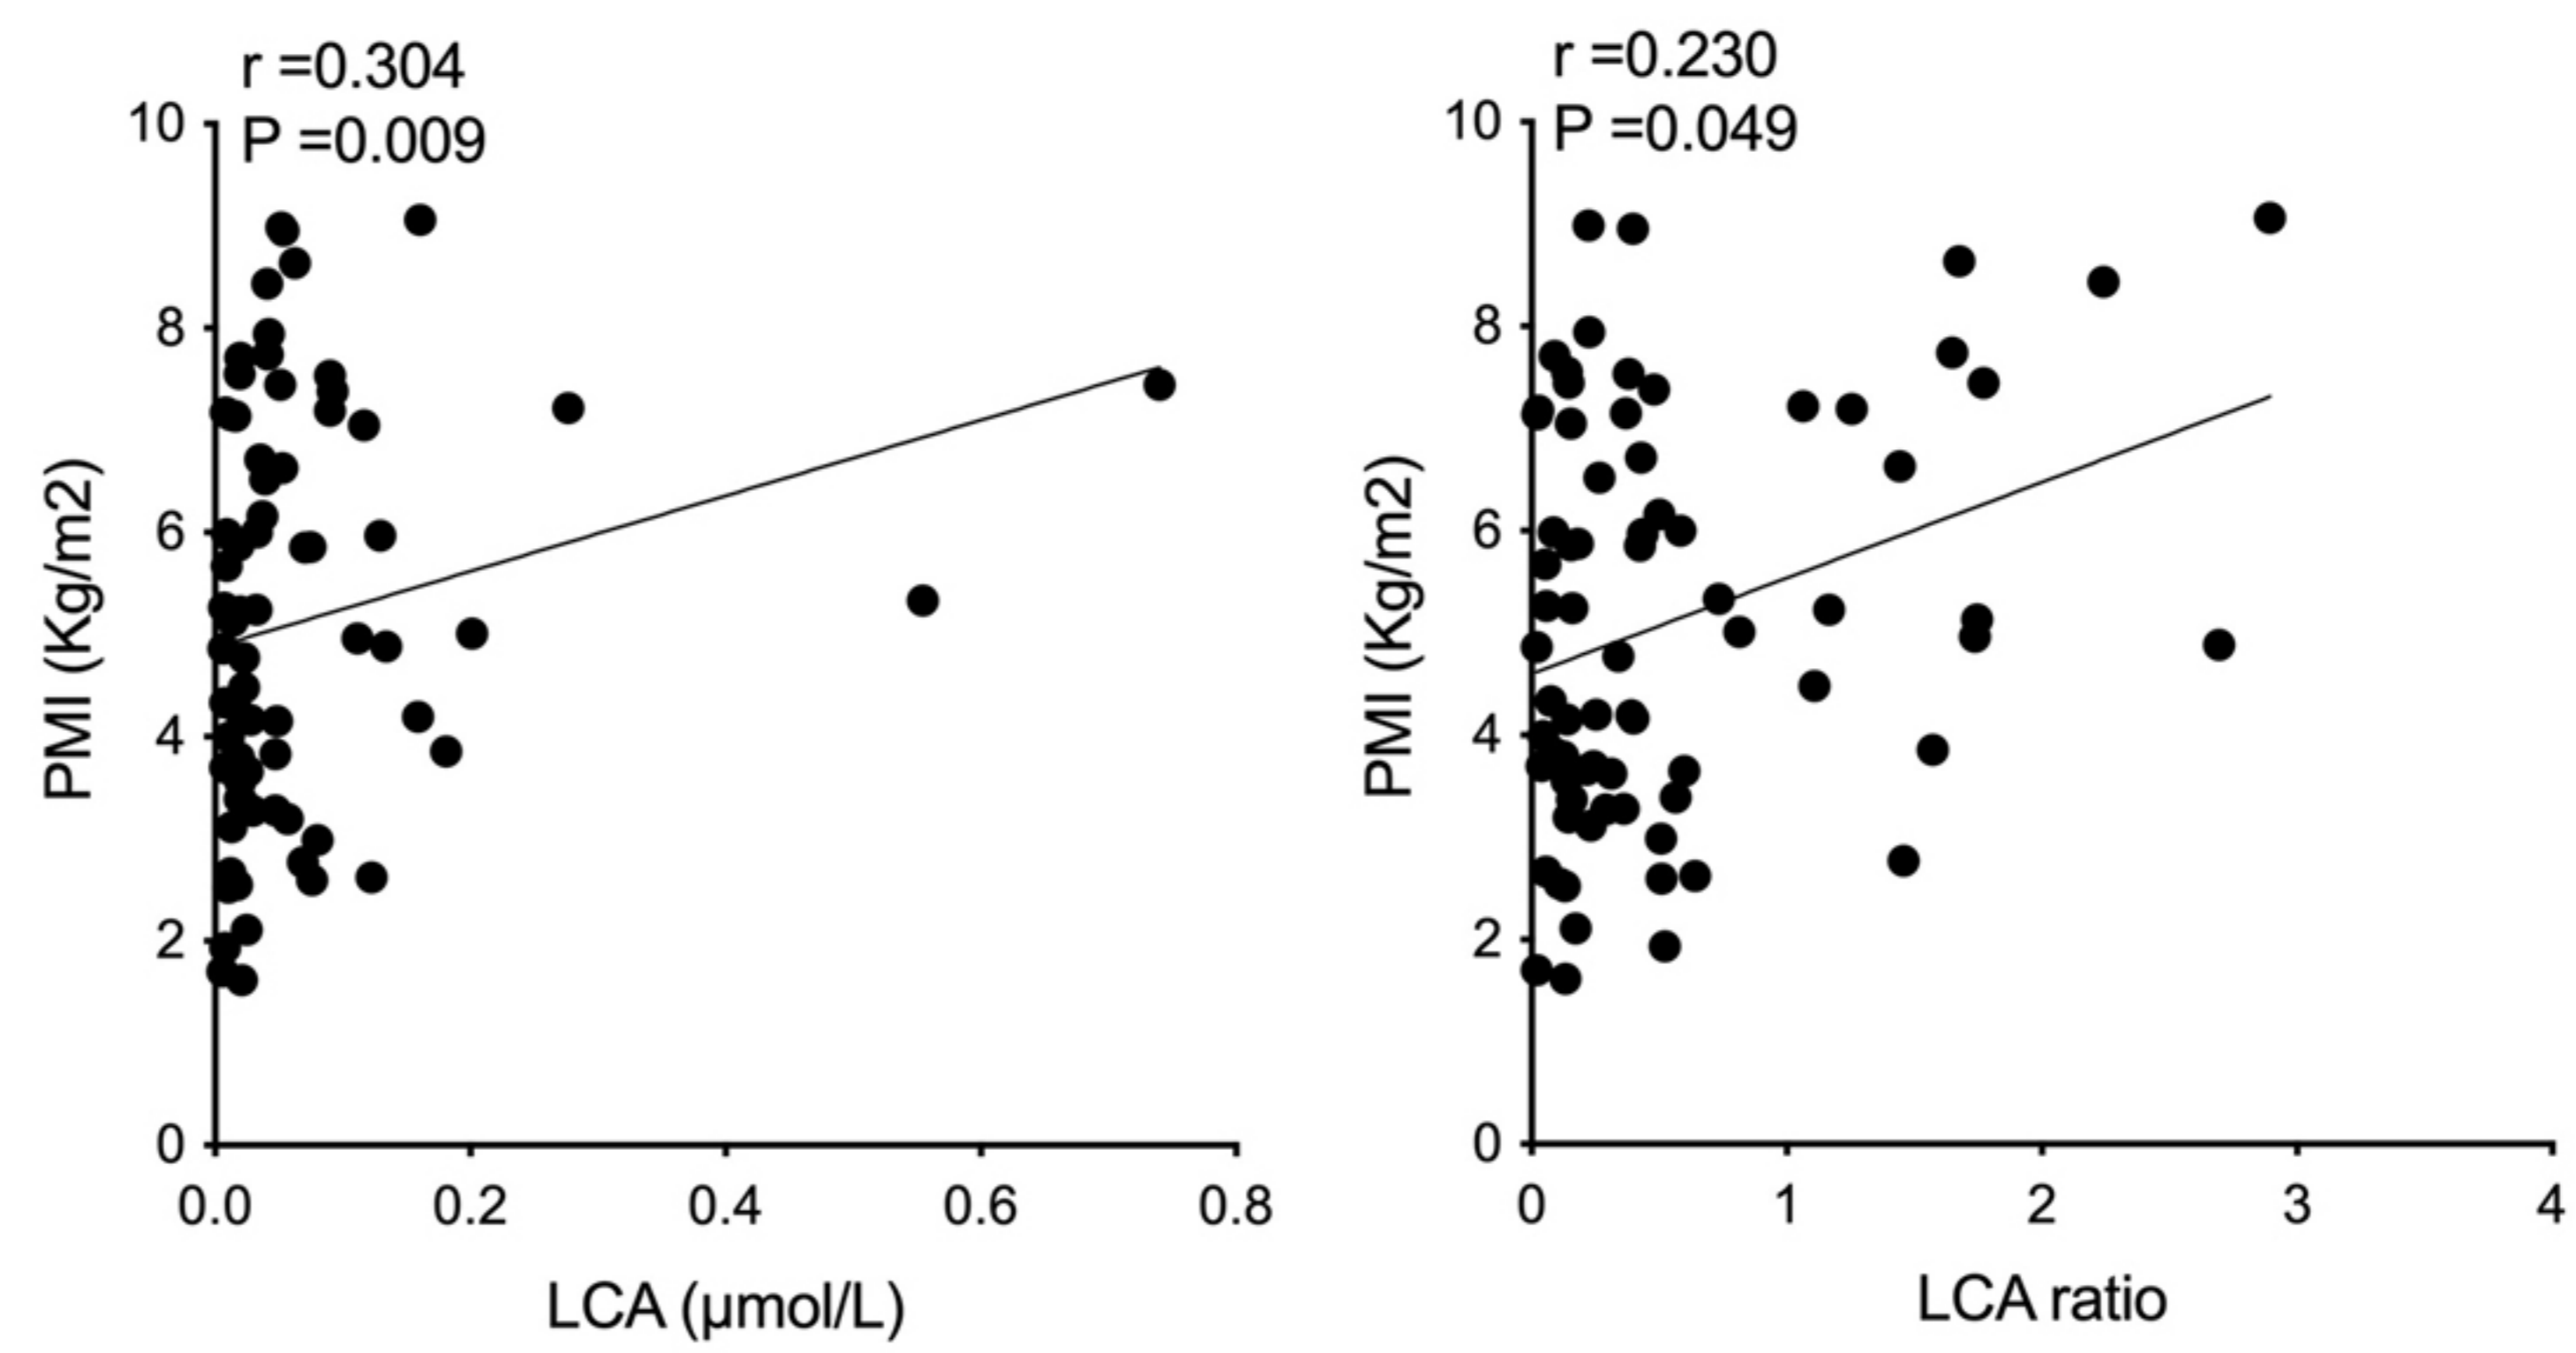

**D**

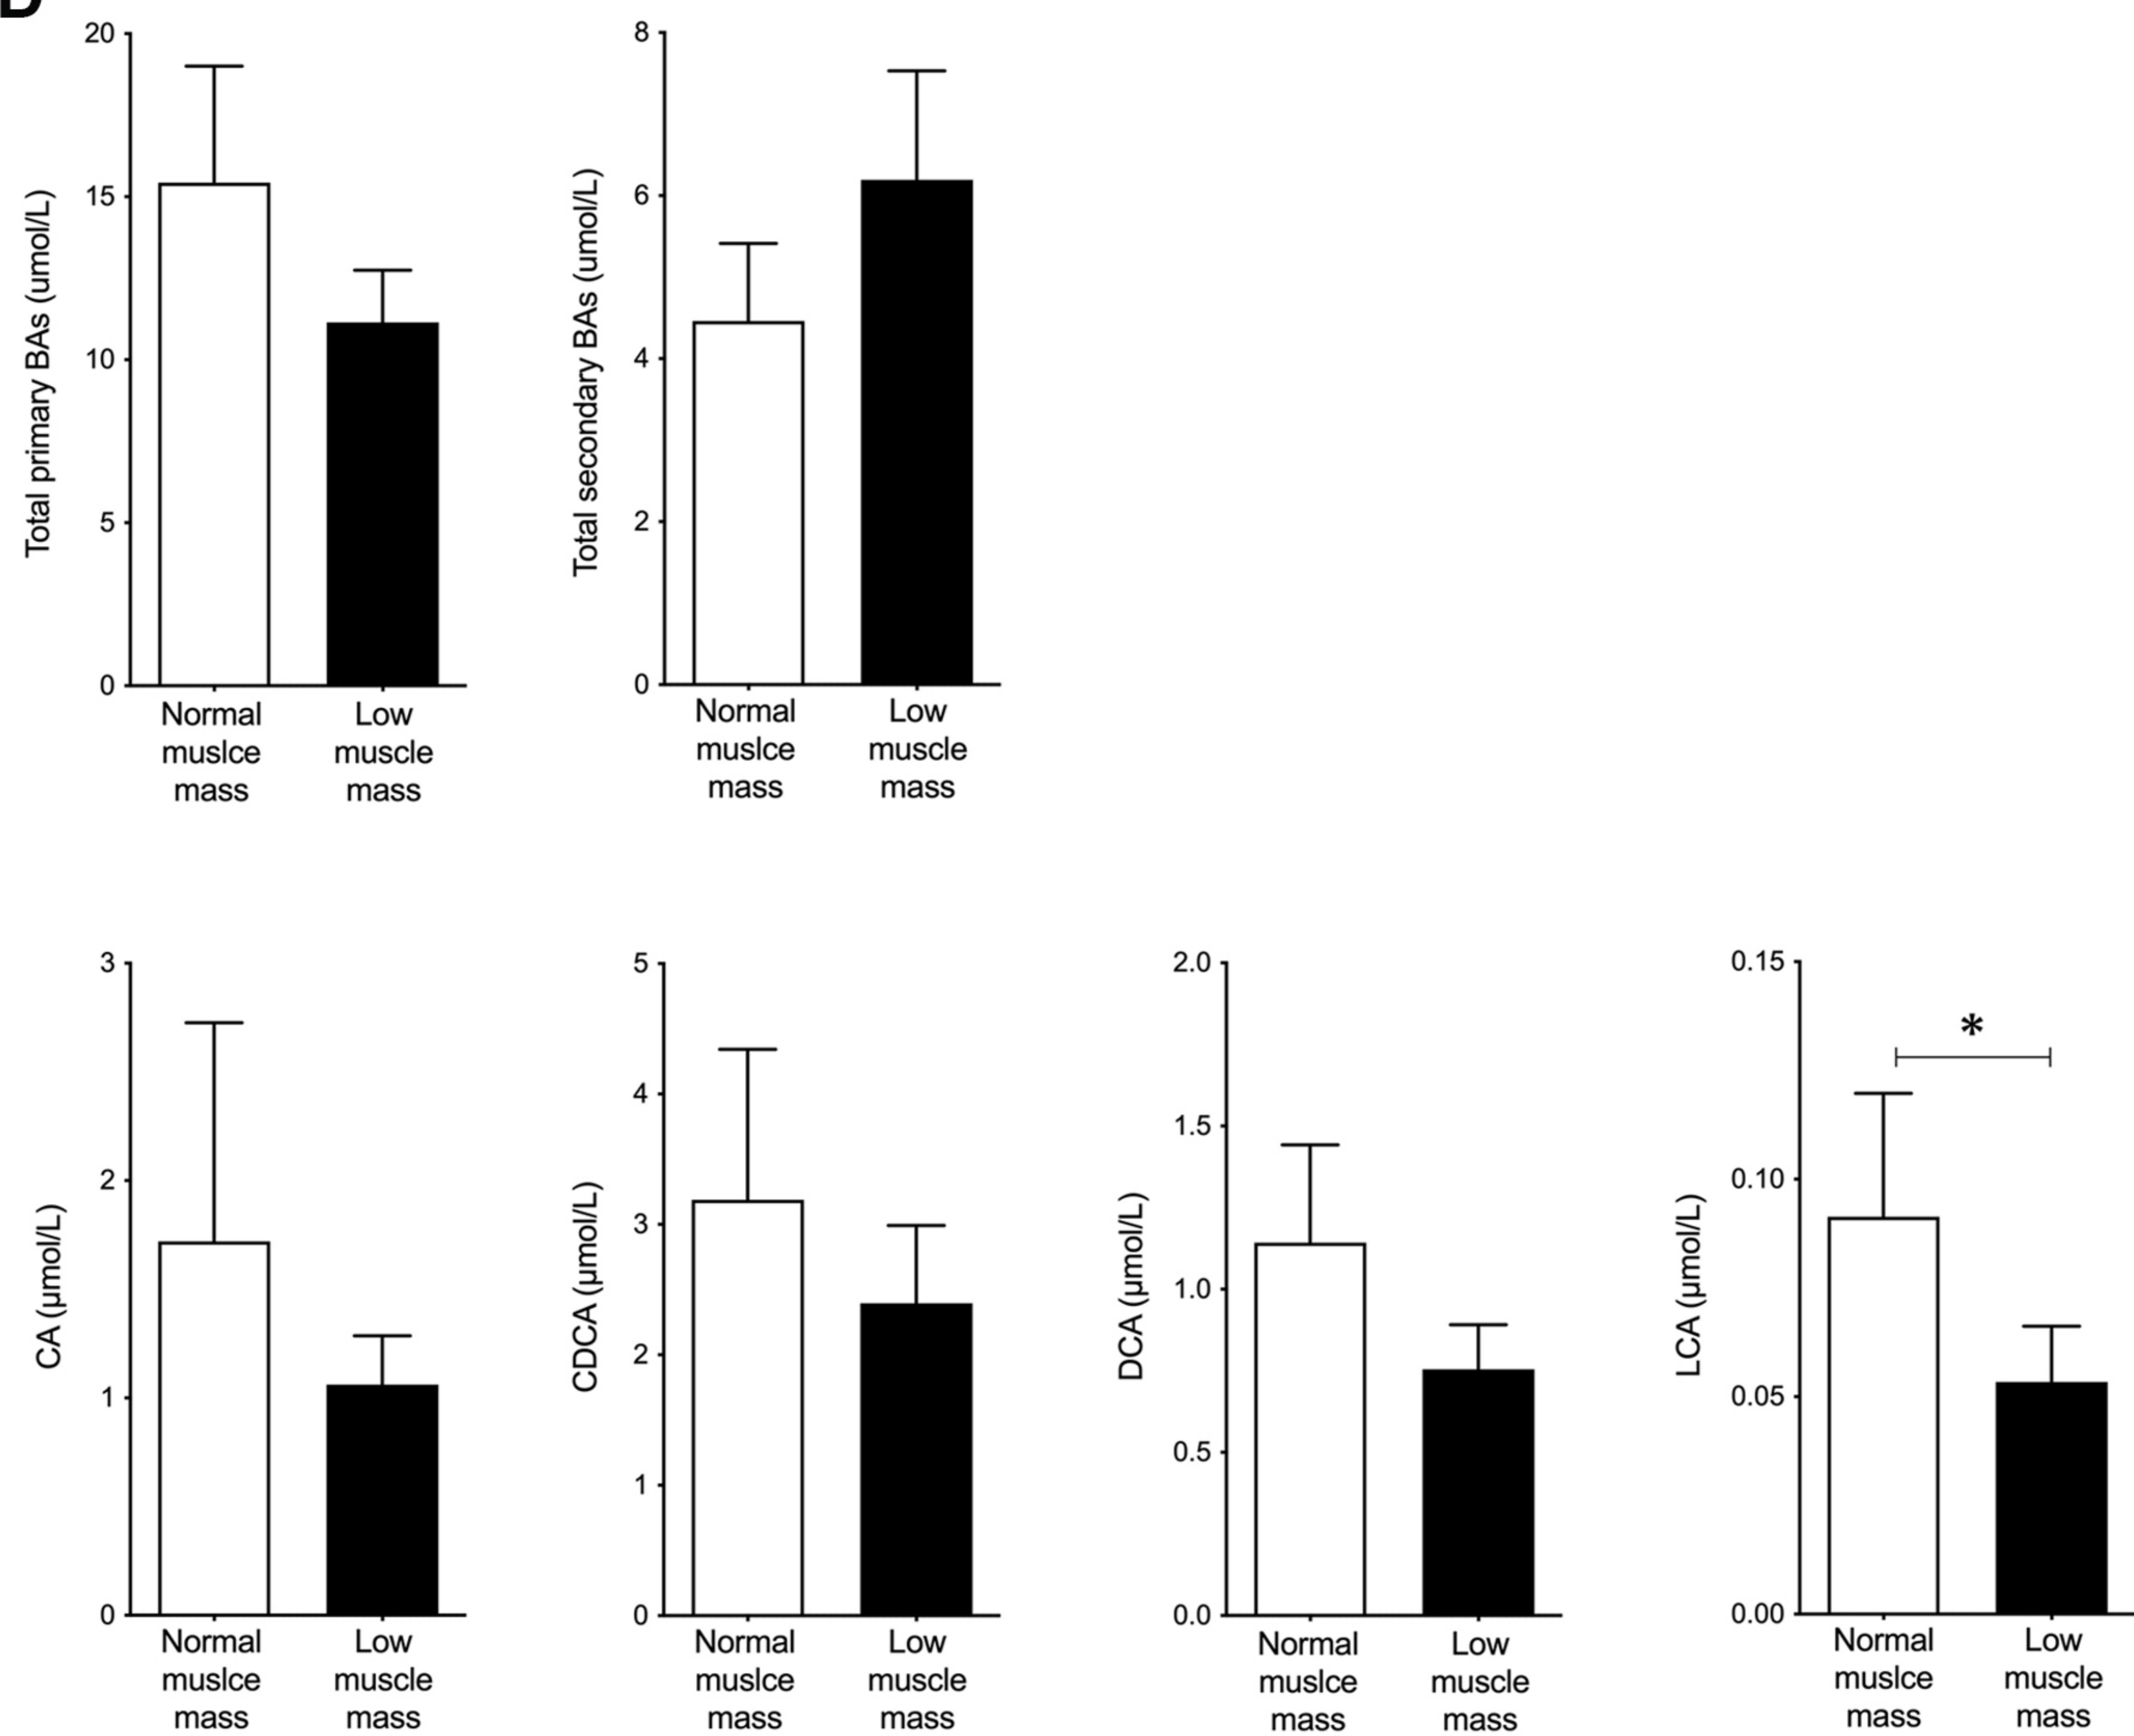

Figure 5 Tamai et al

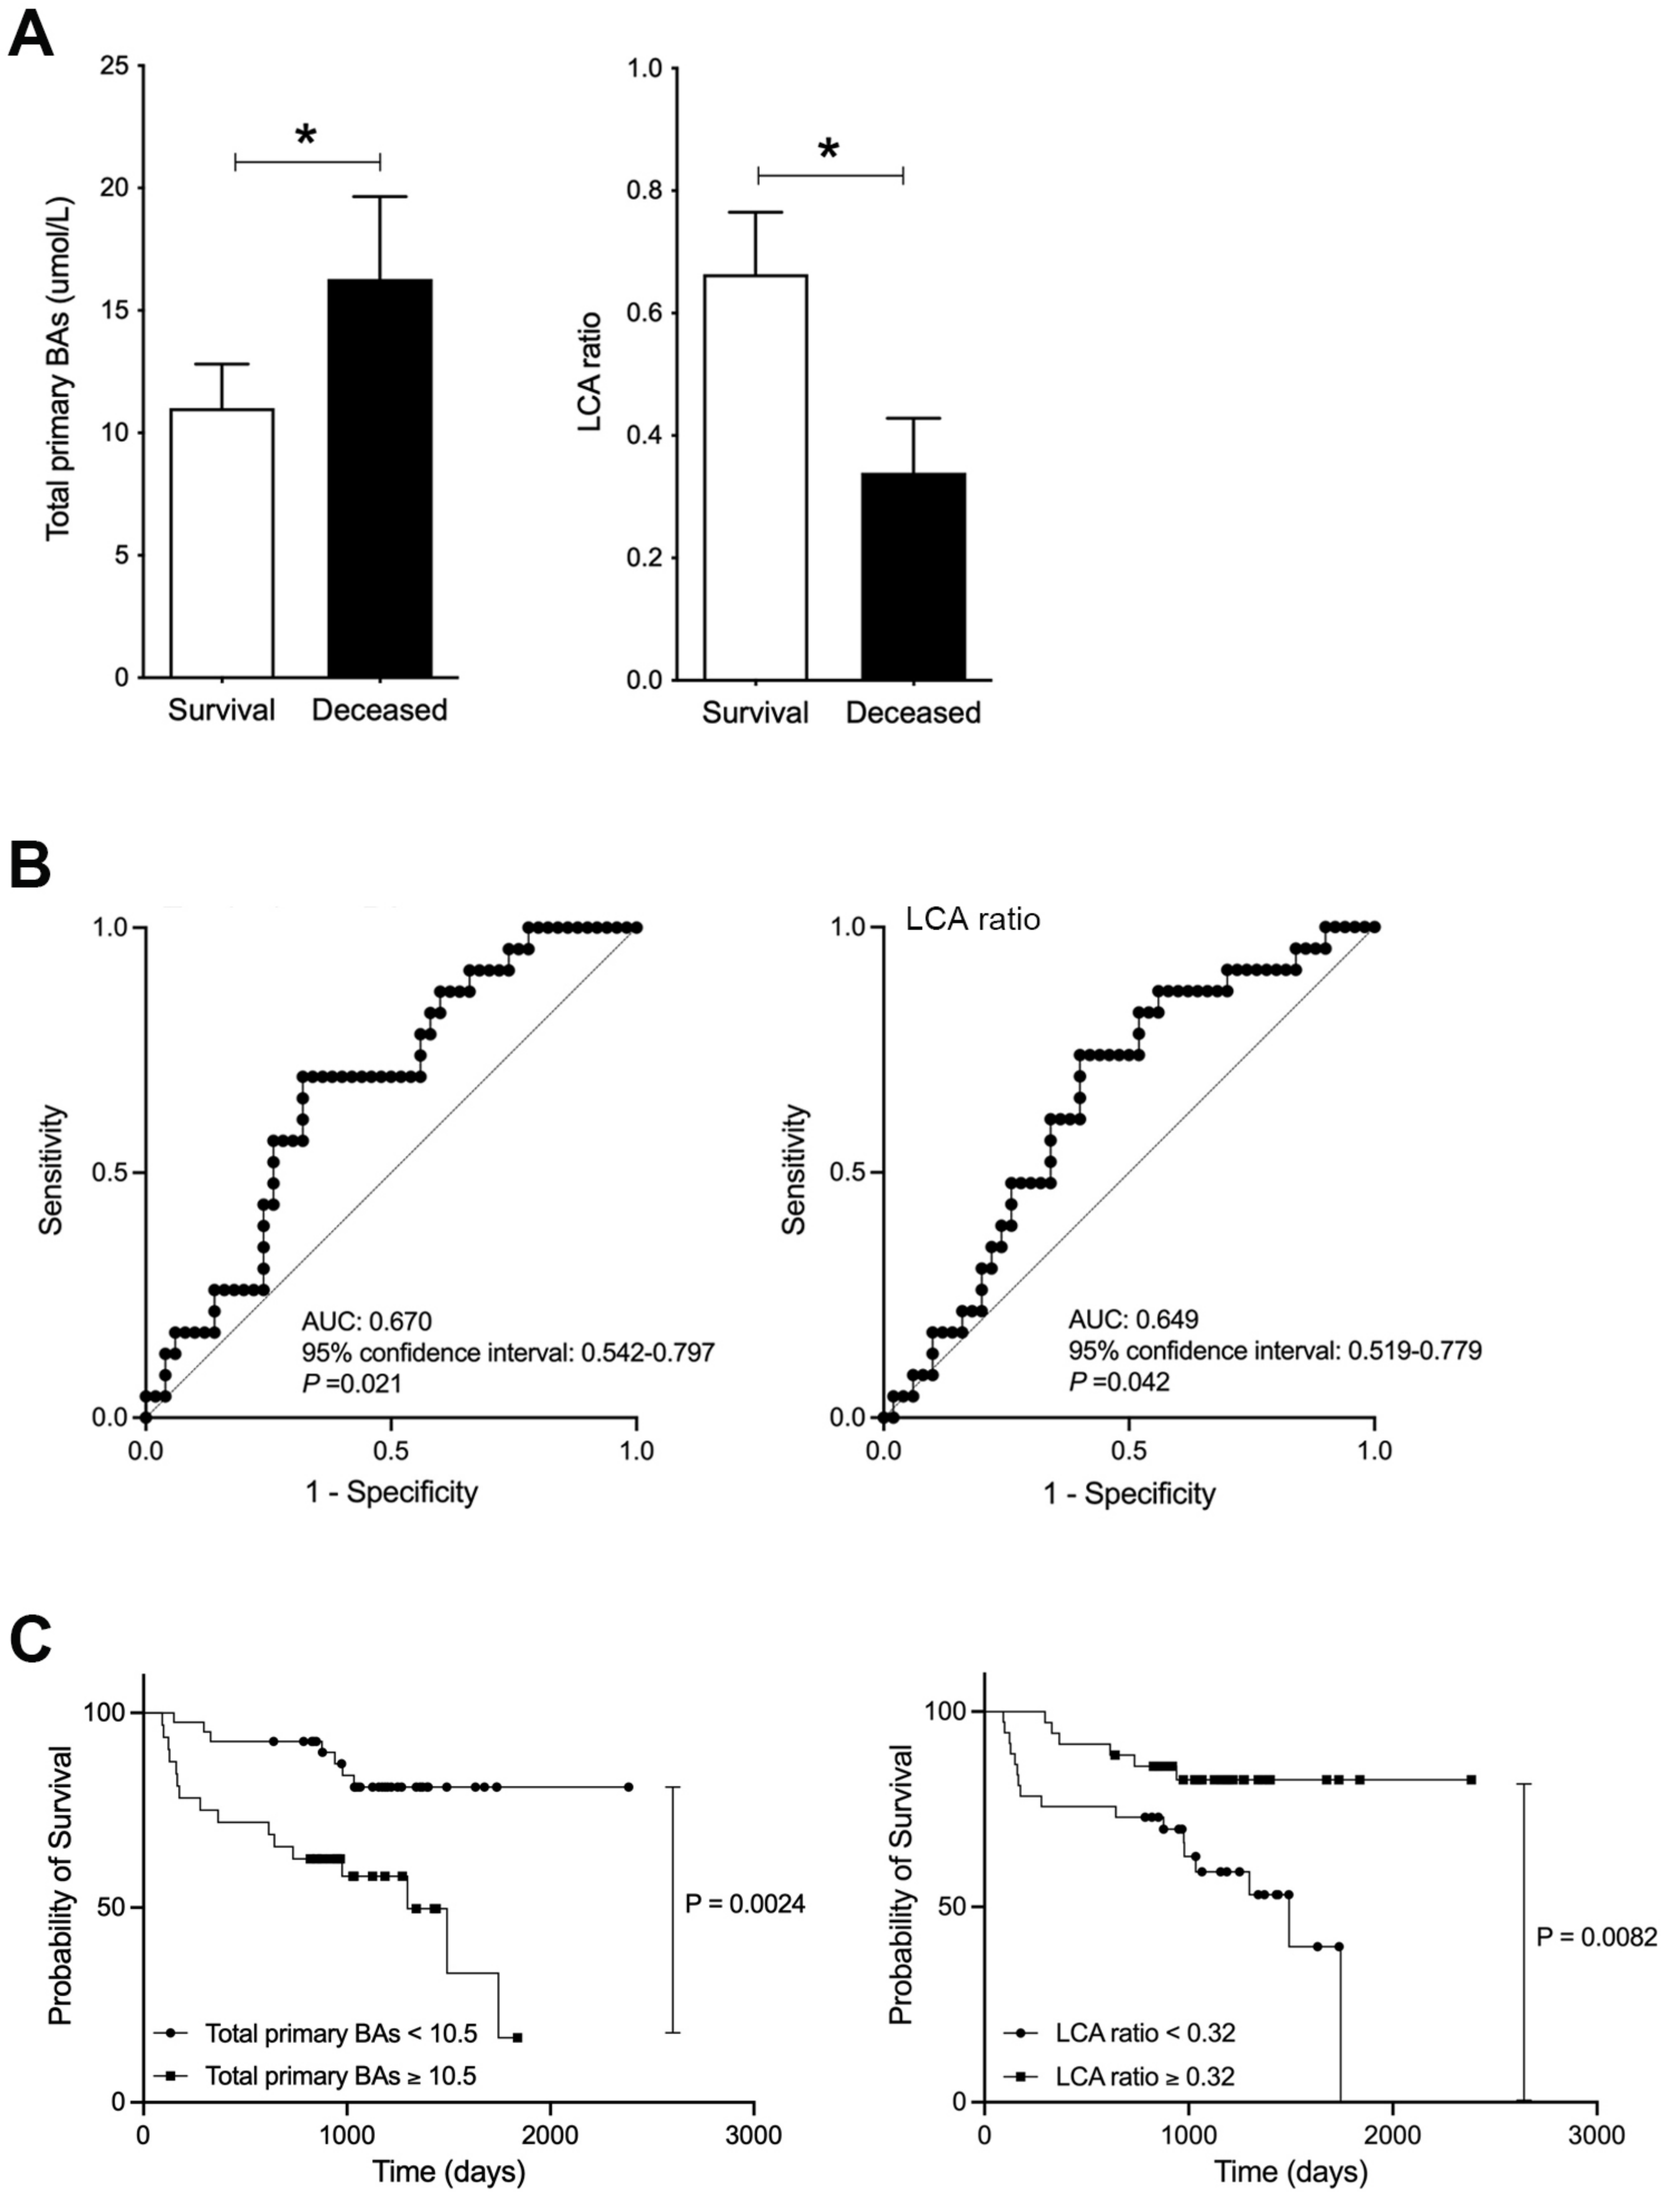

Source: https://www.medrxiv.org/content/medrxiv/early/2022/06/16/2022.06.14.22276395.full.pdf
